# Supplementary material for: Indirect methanol synthesis from CO2 through high-efficient dimethyl carbonate hydrogenation as a bridge below 100℃
Source: Research Square preprint supplement (doi:10.21203/rs.3.rs-5444292/v1), 2024-12-19
Supplement: Supplementary file 1 [file 6cec3eaf9c6eb30103c64602.docx]

**Indirect methanol synthesis from CO2 through high-efficient dimethyl carbonate hydrogenation as a bridge below 100°C**

You Wang1,2,#, Jiyun Ren1,#, Yunxia Liu1, Qing Guo1, Xin Zhou1, Wenjie Guo1, Yongquan Qu1,* and Sai Zhang1,2,*

*1* *School of Chemistry and Chemical Engineering,* *Northwestern Polytechnical University, Xi’an, 710072, China*

*2 Research & Development Institute of Northwestern Polytechnical University in Shenzhen, Shenzhen, 518057, China*

*# These authors contributed equally to this work.*

Correspondence and requests for materials should be addressed to Zhang S. and Qu Y. Q. (Email: [zhangsai1112@nwpu.edu.cn](mailto:zhangsai1112@nwpu.edu.cn) and [yongquan@nwpu.edu.cn](mailto:yongquan@nwpu.edu.cn))

***1. Characterization methods***

The structure and crystallinity of the catalysts were characterized by an X-ray diffraction analysis (XRD, Rigaku Mini Flex 600 with Cu Kα radiation) with Cu Kα radiation operating at 45 kV between 5° and 90°. The microstructures and compositions were examined using transmission electron microscopy (TEM, FEI Talos F200X) operating at an acceleration voltage of 200 kV. The chemical states and oxygen vacancies were investigated using X-ray photoelectron spectroscopy (XPS, Kratos AXIS Ultra DLD). Electron paramagnetic resonance (EPR) spectroscopic measurements were performed at room temperature using Bruker A2009. 5/12 spectrometer (Germany). The Micrometrics Autochem II 2920 apparatus was employed to conduct Temperature-programmed desorption (TPD) and temperature-programmed reduction (TPR) experiments.

*In situ* diffuse reflectance Fourier transform infrared spectroscopy (DRIFTS) was performed on an INVENIO S (BRUKER) equipped with a MCT detector by the following procedures. Before the tests, 20 mg of catalysts were placed in the dry pot and heated to 200 °C and maintained at this temperature for 30 min under a flow of argon. All of the background spectra were collected at 30 or 100 °C before the measurements.

***2. Catalytic production of dimethyl carbonate (DMC) from CH3OH with CO2***

For synthesis of DMC, a mixture containing 10 mL of CH3OH and 20 mg of catalysts was added into a 55 mL autoclave equipped with a pressure detector. Subsequently, the autoclave was purged with CO2 for three times and then pressurized to 1.0 MPa of CO2 before catalytic reactions. The autoclave was then heated to 100 oC and maintained at this temperature under the stirring with a rate of 400 rpm for 1 h. After the reaction, the gas mixture was collected using a gas sampling bag and then analyzed using gas chromatography equipped with TCD and FID. The liquid products were analyzed using gas chromatography equipped with a flame ionization detector.

The generated amount (n, in mmol) of the DMC and CH3OH is calculated using eqs S1. The generation rate of *r* (mmol gcat-1 h-1) is calculated using eqs S2. The eqs S3 is used to calculate the generation rate of methanol through two-step synthesis of methanol carbonylation and subsequent DMC hydrogenation.

(S1)

(S2)

(S3)

Where is the integral area of GC for DMC or MeOH; is the rate of the curve obtained by the GC test standard solution of DMC or MeOH (as illustrated in following figure);is calculated by eqs S1; *mcat.* is the mass of catalysts; is the reaction time; is calculated from eqs S2.

The proportion of oxygen vacancies (OV) is calculated by using eqs S4.

(4)

Where, andrepresent the O1*s* of XPS peak area, respectively.


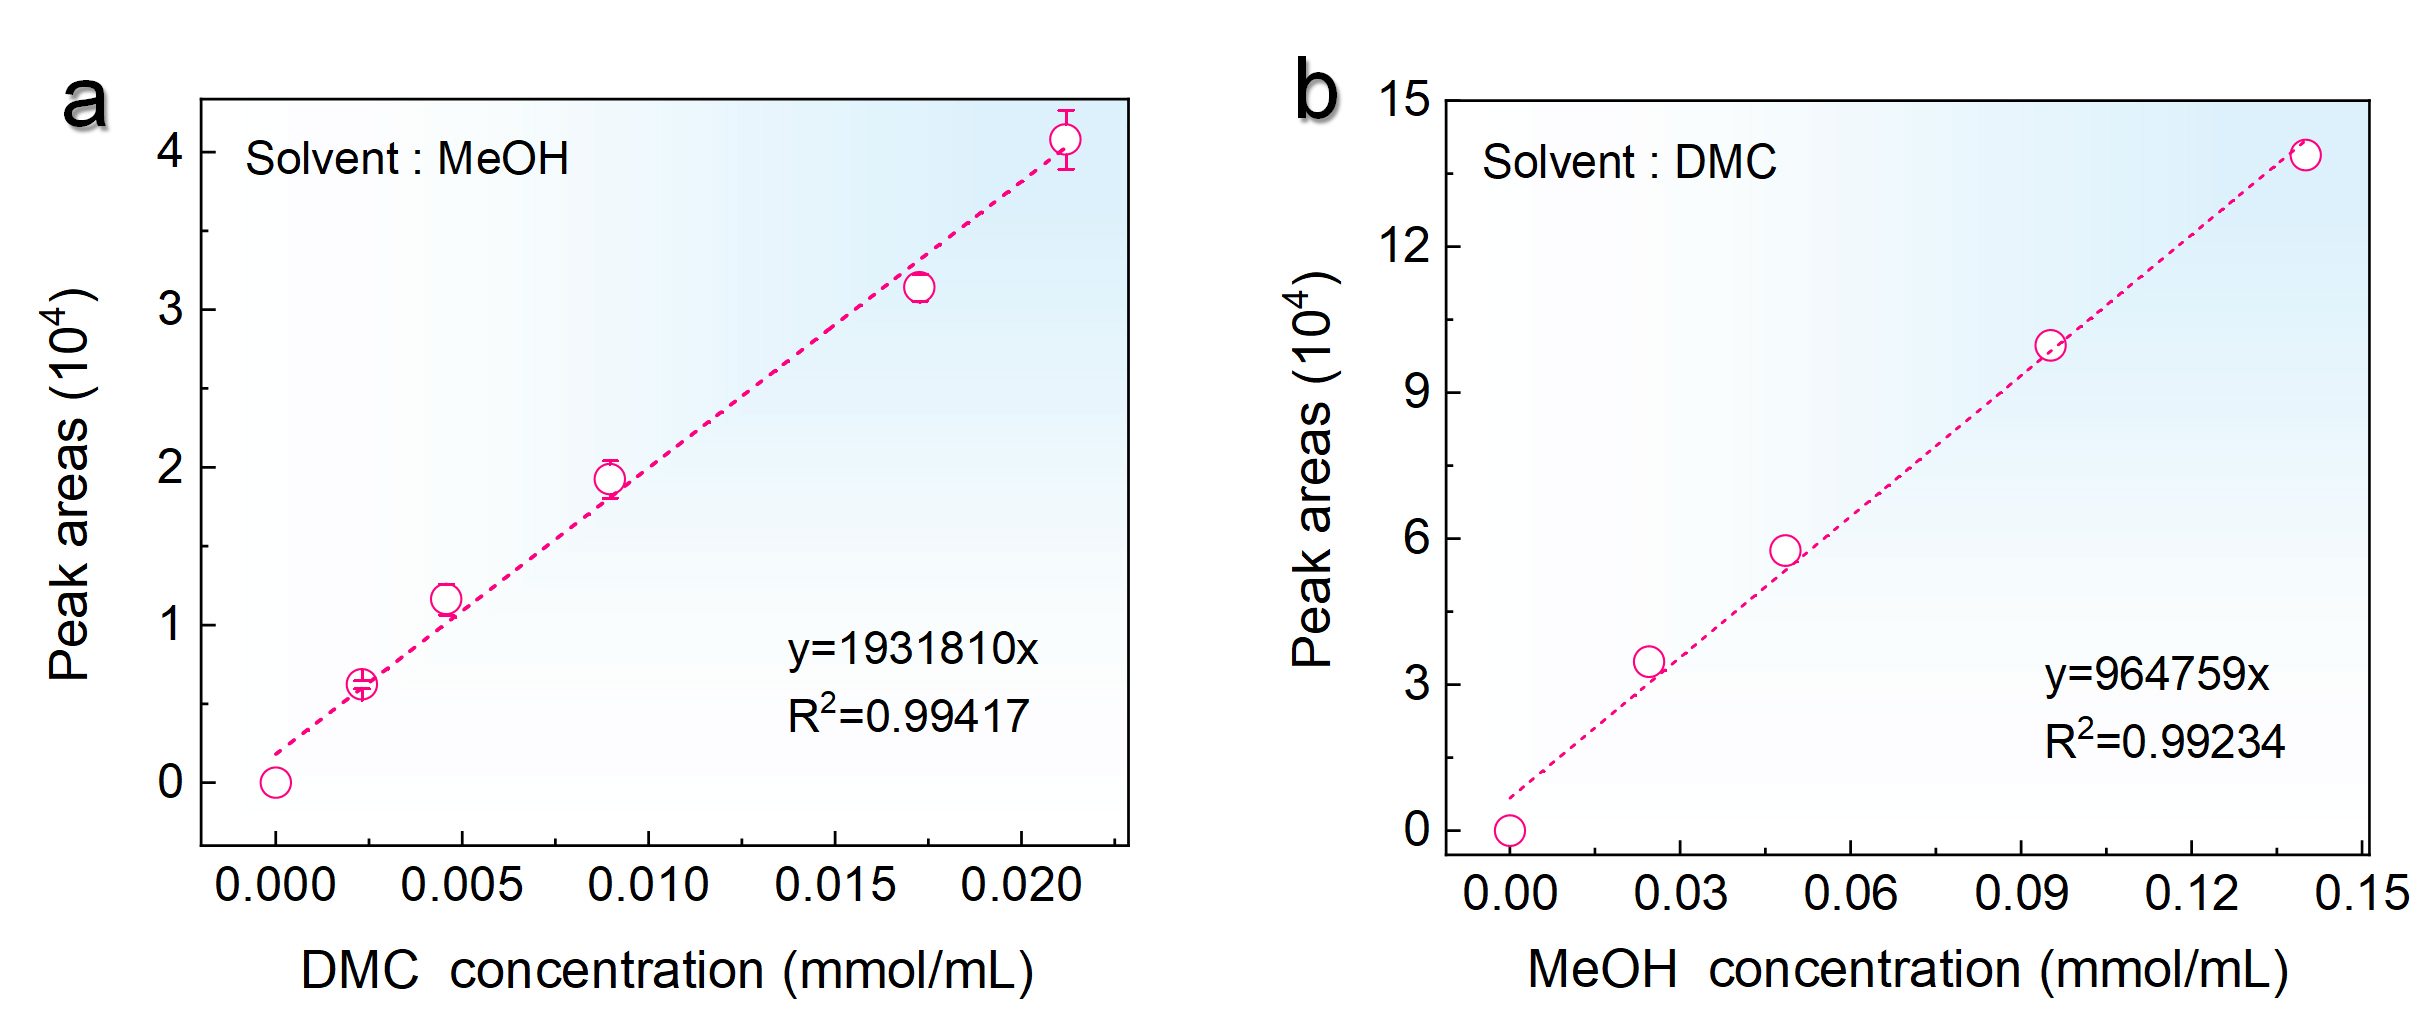


**Standard curve**. (**a**) Relationship between the concentrations of DMC and integrated peak areas of GC (Solvent: MeOH). (**b**) Relationship between the concentrations of MeOH and integrated peak areas of GC (Solvent: DMC).

***3. DFT calculations***

All periodic DFT calculations were performed using the Vienna Ab Initio Simulation Package (VASP).1-3 The projector augmented wave (PAW)4 method was used for the interaction between the core and valence electrons. The valence electron density was described by a plane wave basis set with an energy cut-off of 400 eV.2

Previous studies have demonstrated that the In2O3(111) facet was more stable than other low-index facets.5 The In2O3(111) crystal plane has a four-layer O-In-O three-layer facet simulation with (1x1) unit cells. In a unit cell, there are 12 oxygen atoms in each In-O layer, containing a total of 96 O and 64 In atoms, which are denoted as In2O3(111). The surface slab was separated by a vacuum height of 15 Å in the z-direction to eliminate unphysical interactions between periodic surface plates. Brillouin-zone integrations were performed using a Γ-centered (2 × 2 × 1) *k*-point mesh.

The calculated lattice constant (a=b=c=10.2886 Å) and In-O bond length (2.164 Å) of the In2O3 block are consistent with the experimental results. During the optimization process, the atoms in the bottom three layers of the surface facet are fixed, while the remaining atoms are allowed to relax. The thresholds for converging the electronic wavefunctions and atomic structures are 10-4 eV for the energy and 0.02 eV/Å for the maximal force, respectively.

Adsorption energy (**Eads*) is defined as, **Eads*=*Etotal*-*Eslab*-(aEH+bED), where *Etotal* and *Eslab* are the total energies of a surface with an adsorbate and a clean surface, respectively. The elemental energies of H and D refer to the gas phases H2 and DMC, respectively. a and b represent the number of H2 and DMC, respectively.


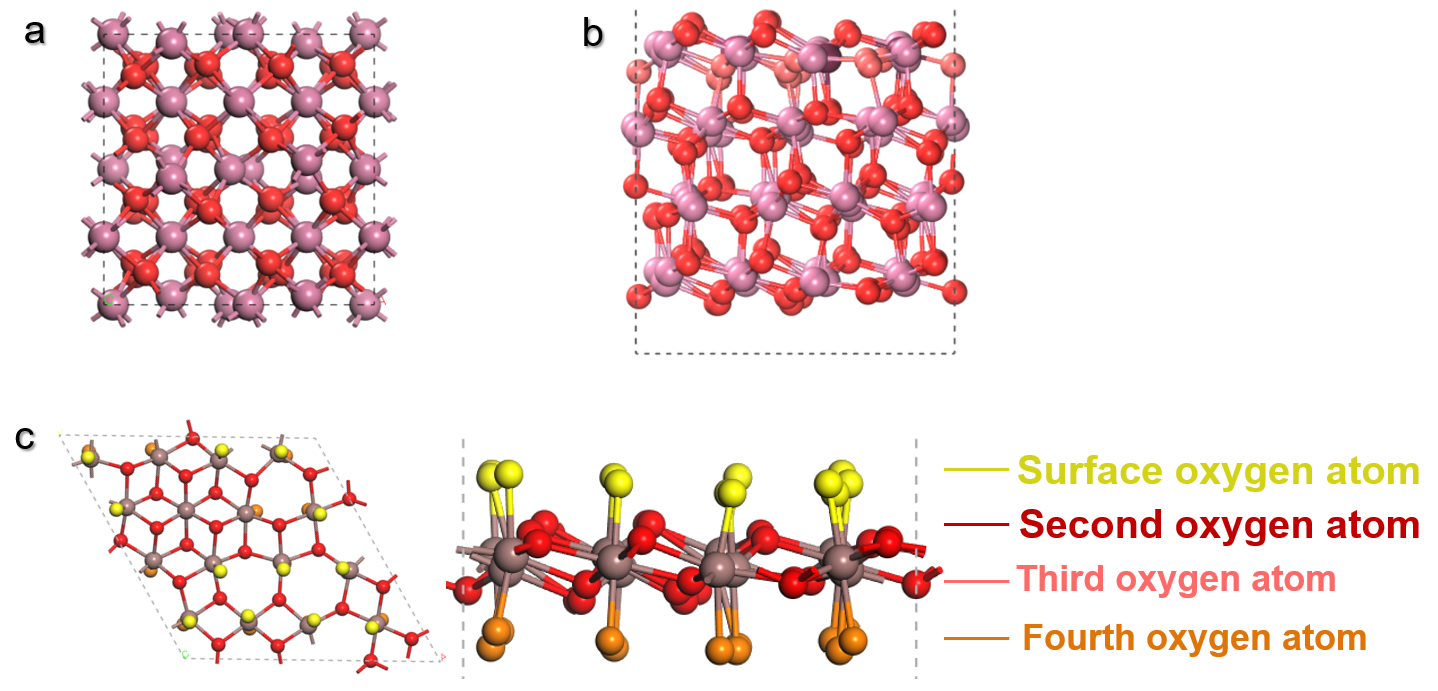


**Figure S1.** **Optimized In2O3(111) crystal face**. (**a**) Unit cell and (**b**) side view of the optimized In2O3(111) crystal face. (**c**) One layer of In atoms with four different layers of oxygen atoms of In2O3(111) crystal face.

**Figure S2. Optimized adsorption configuration of H2.** H2 adsorption behaviors on In6, In5, In4+1 and In4···In4 sites on the In2O3(111) surface.

**
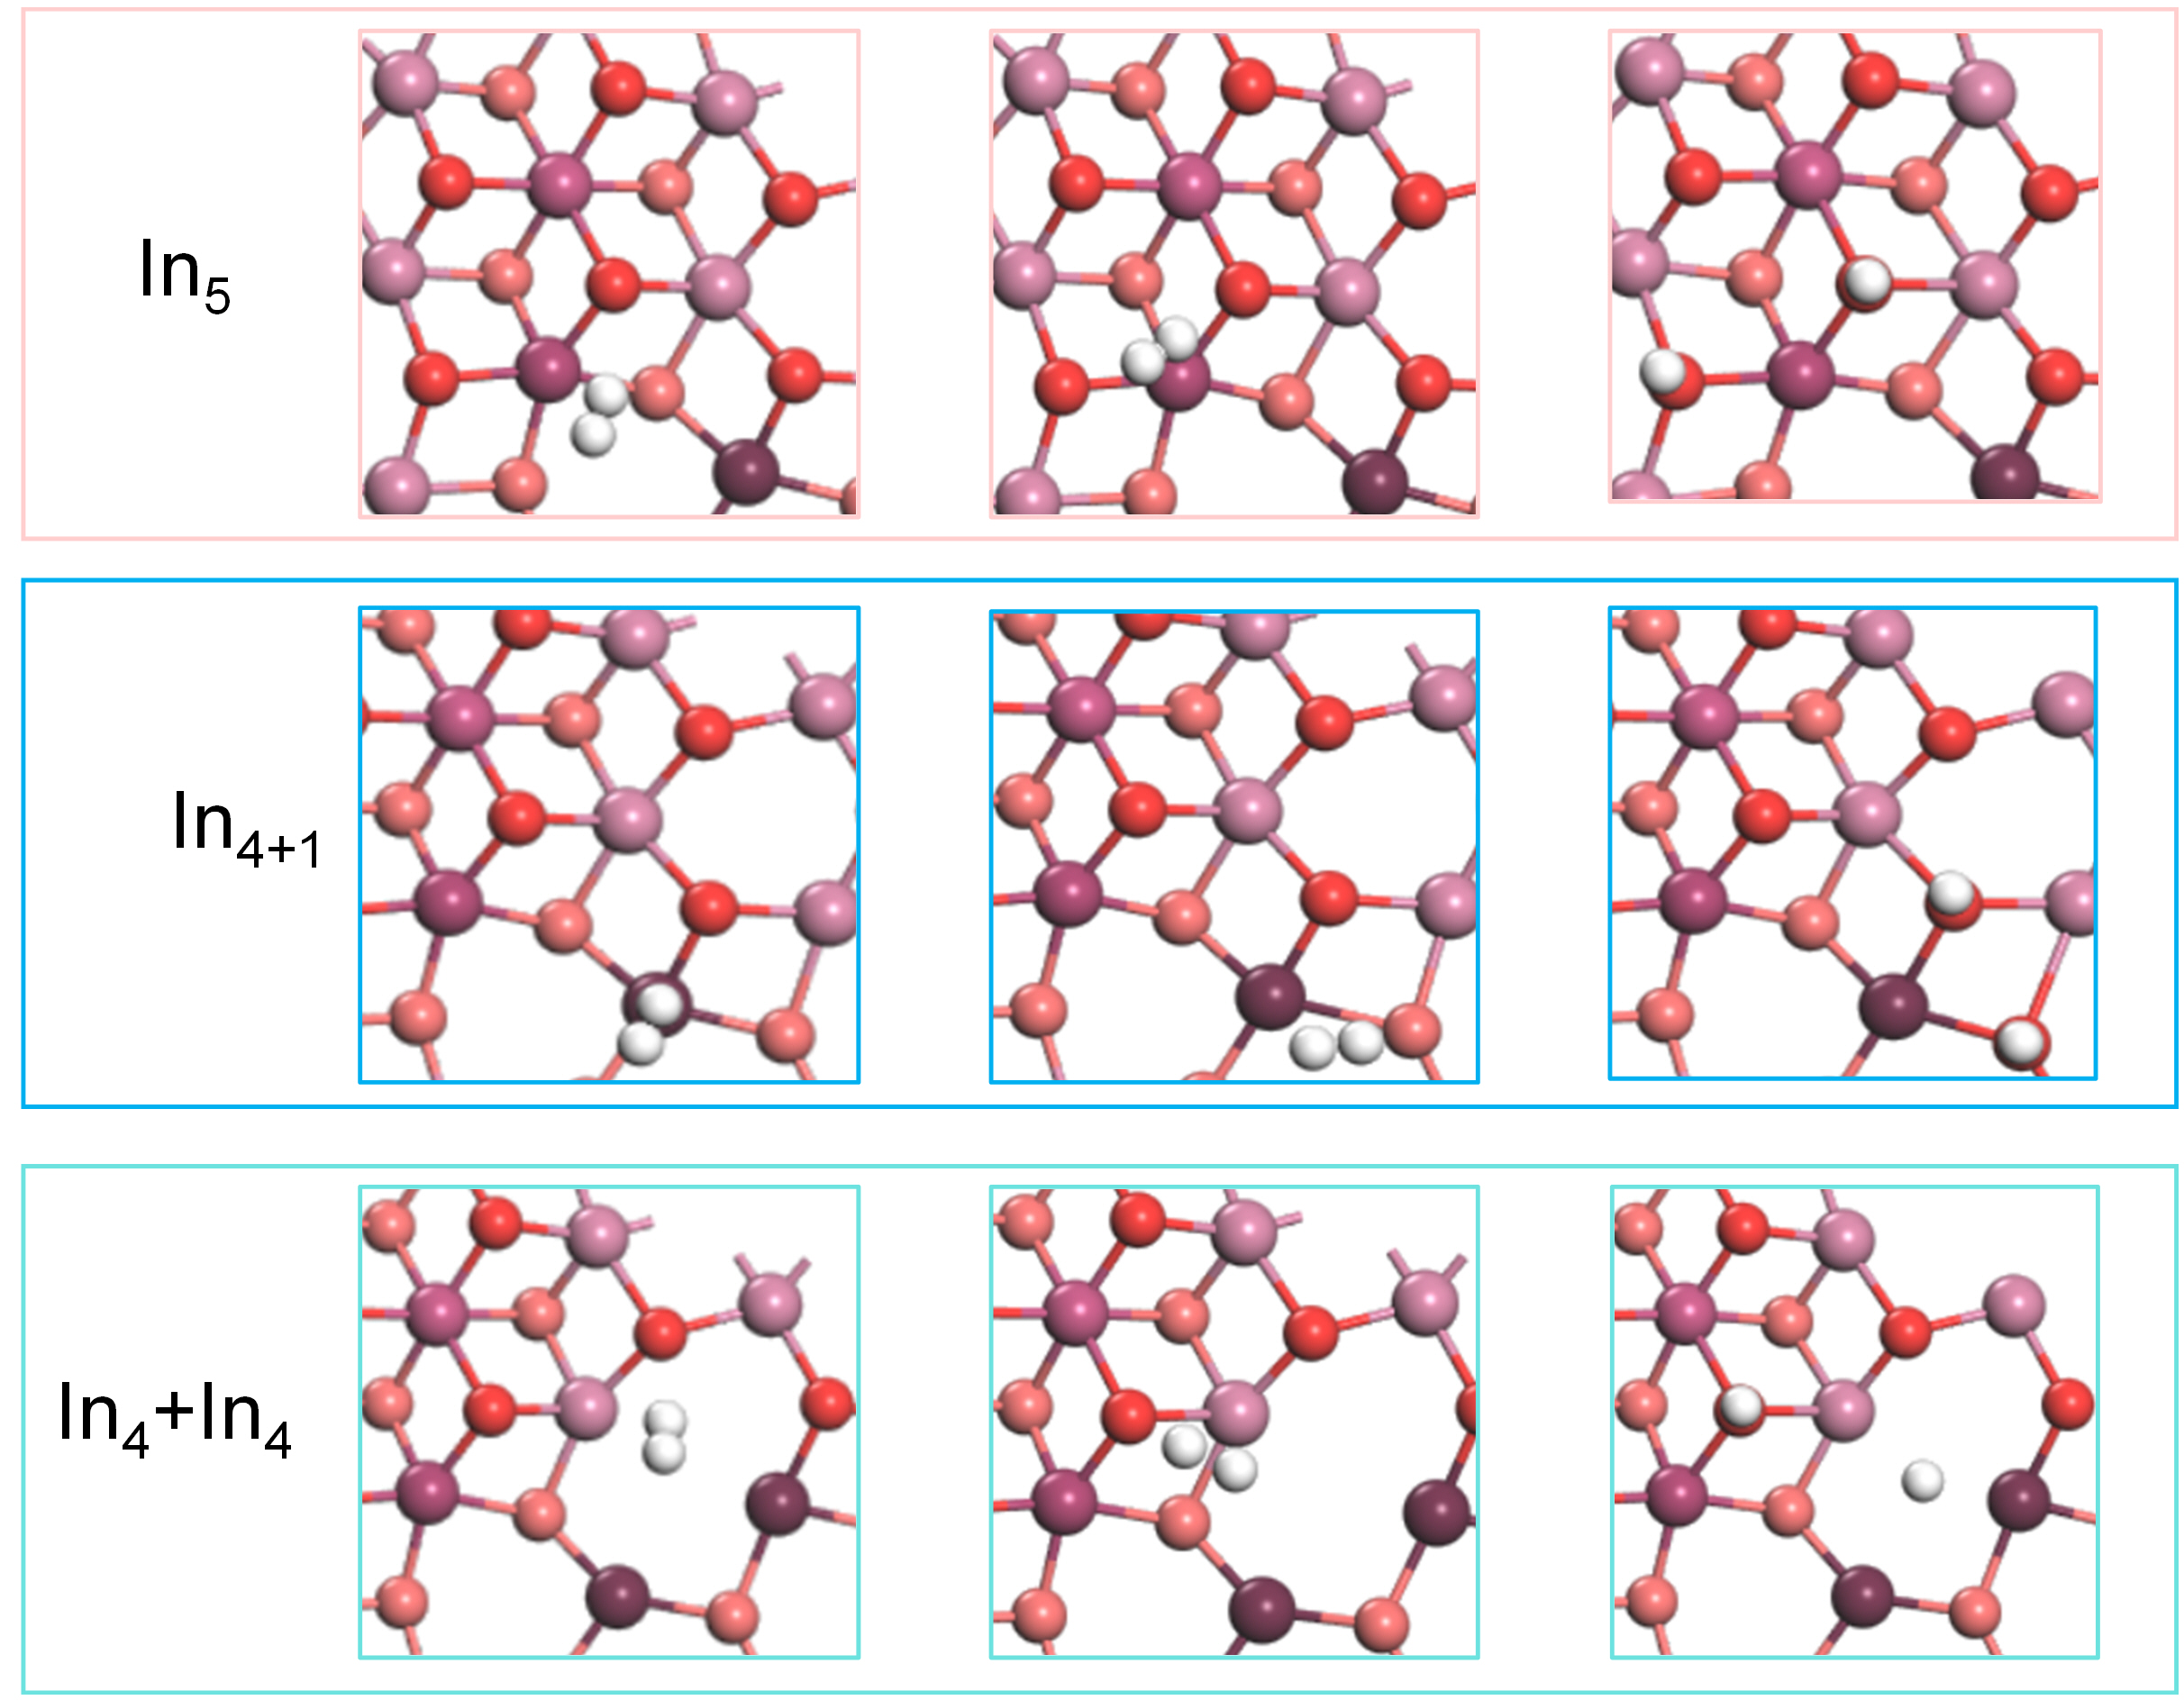
**

**Figure S3. Optimized adsorption configurations of the active hydrogen species.** The optimized adsorption structures of the reaction intermediates of H2 dissociation on In5, In4+1 and In4···In4 sites of the In2O3(111) surface.

**Figure S4.** **Optimized adsorption configurations of DMC.** DMCadsorption behaviors on In6, In5, In4+1 and In4···In4 sites on the optimized In2O3(111) surface.


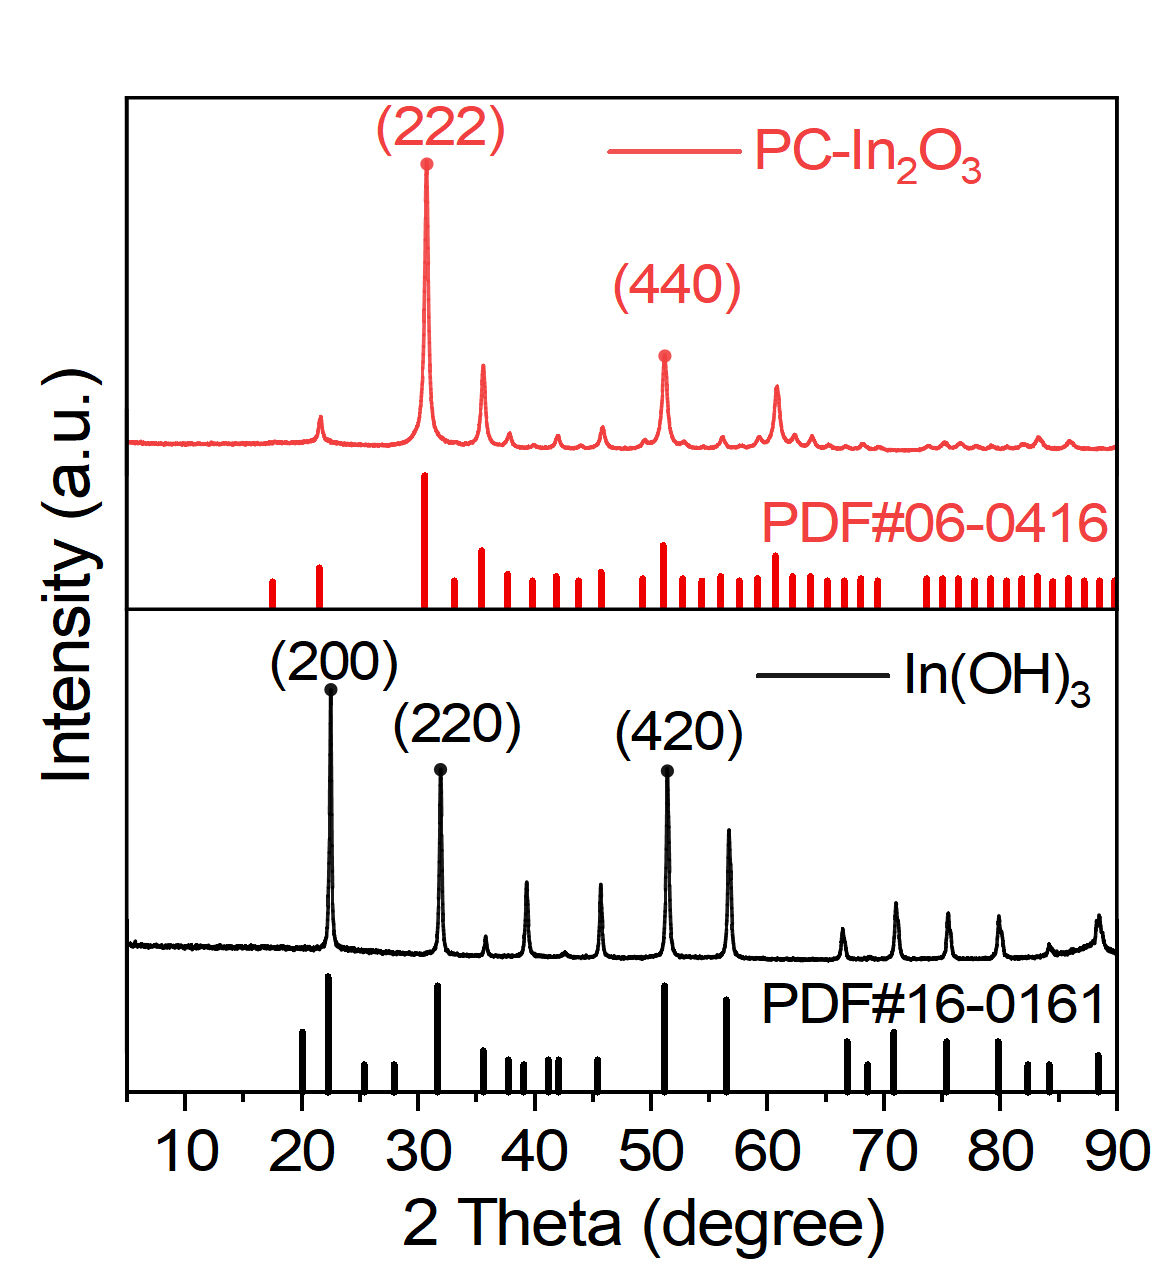


**Figure S5. XRD patterns of the In(OH)3 precursors and PC-In2O3 catalysts.**


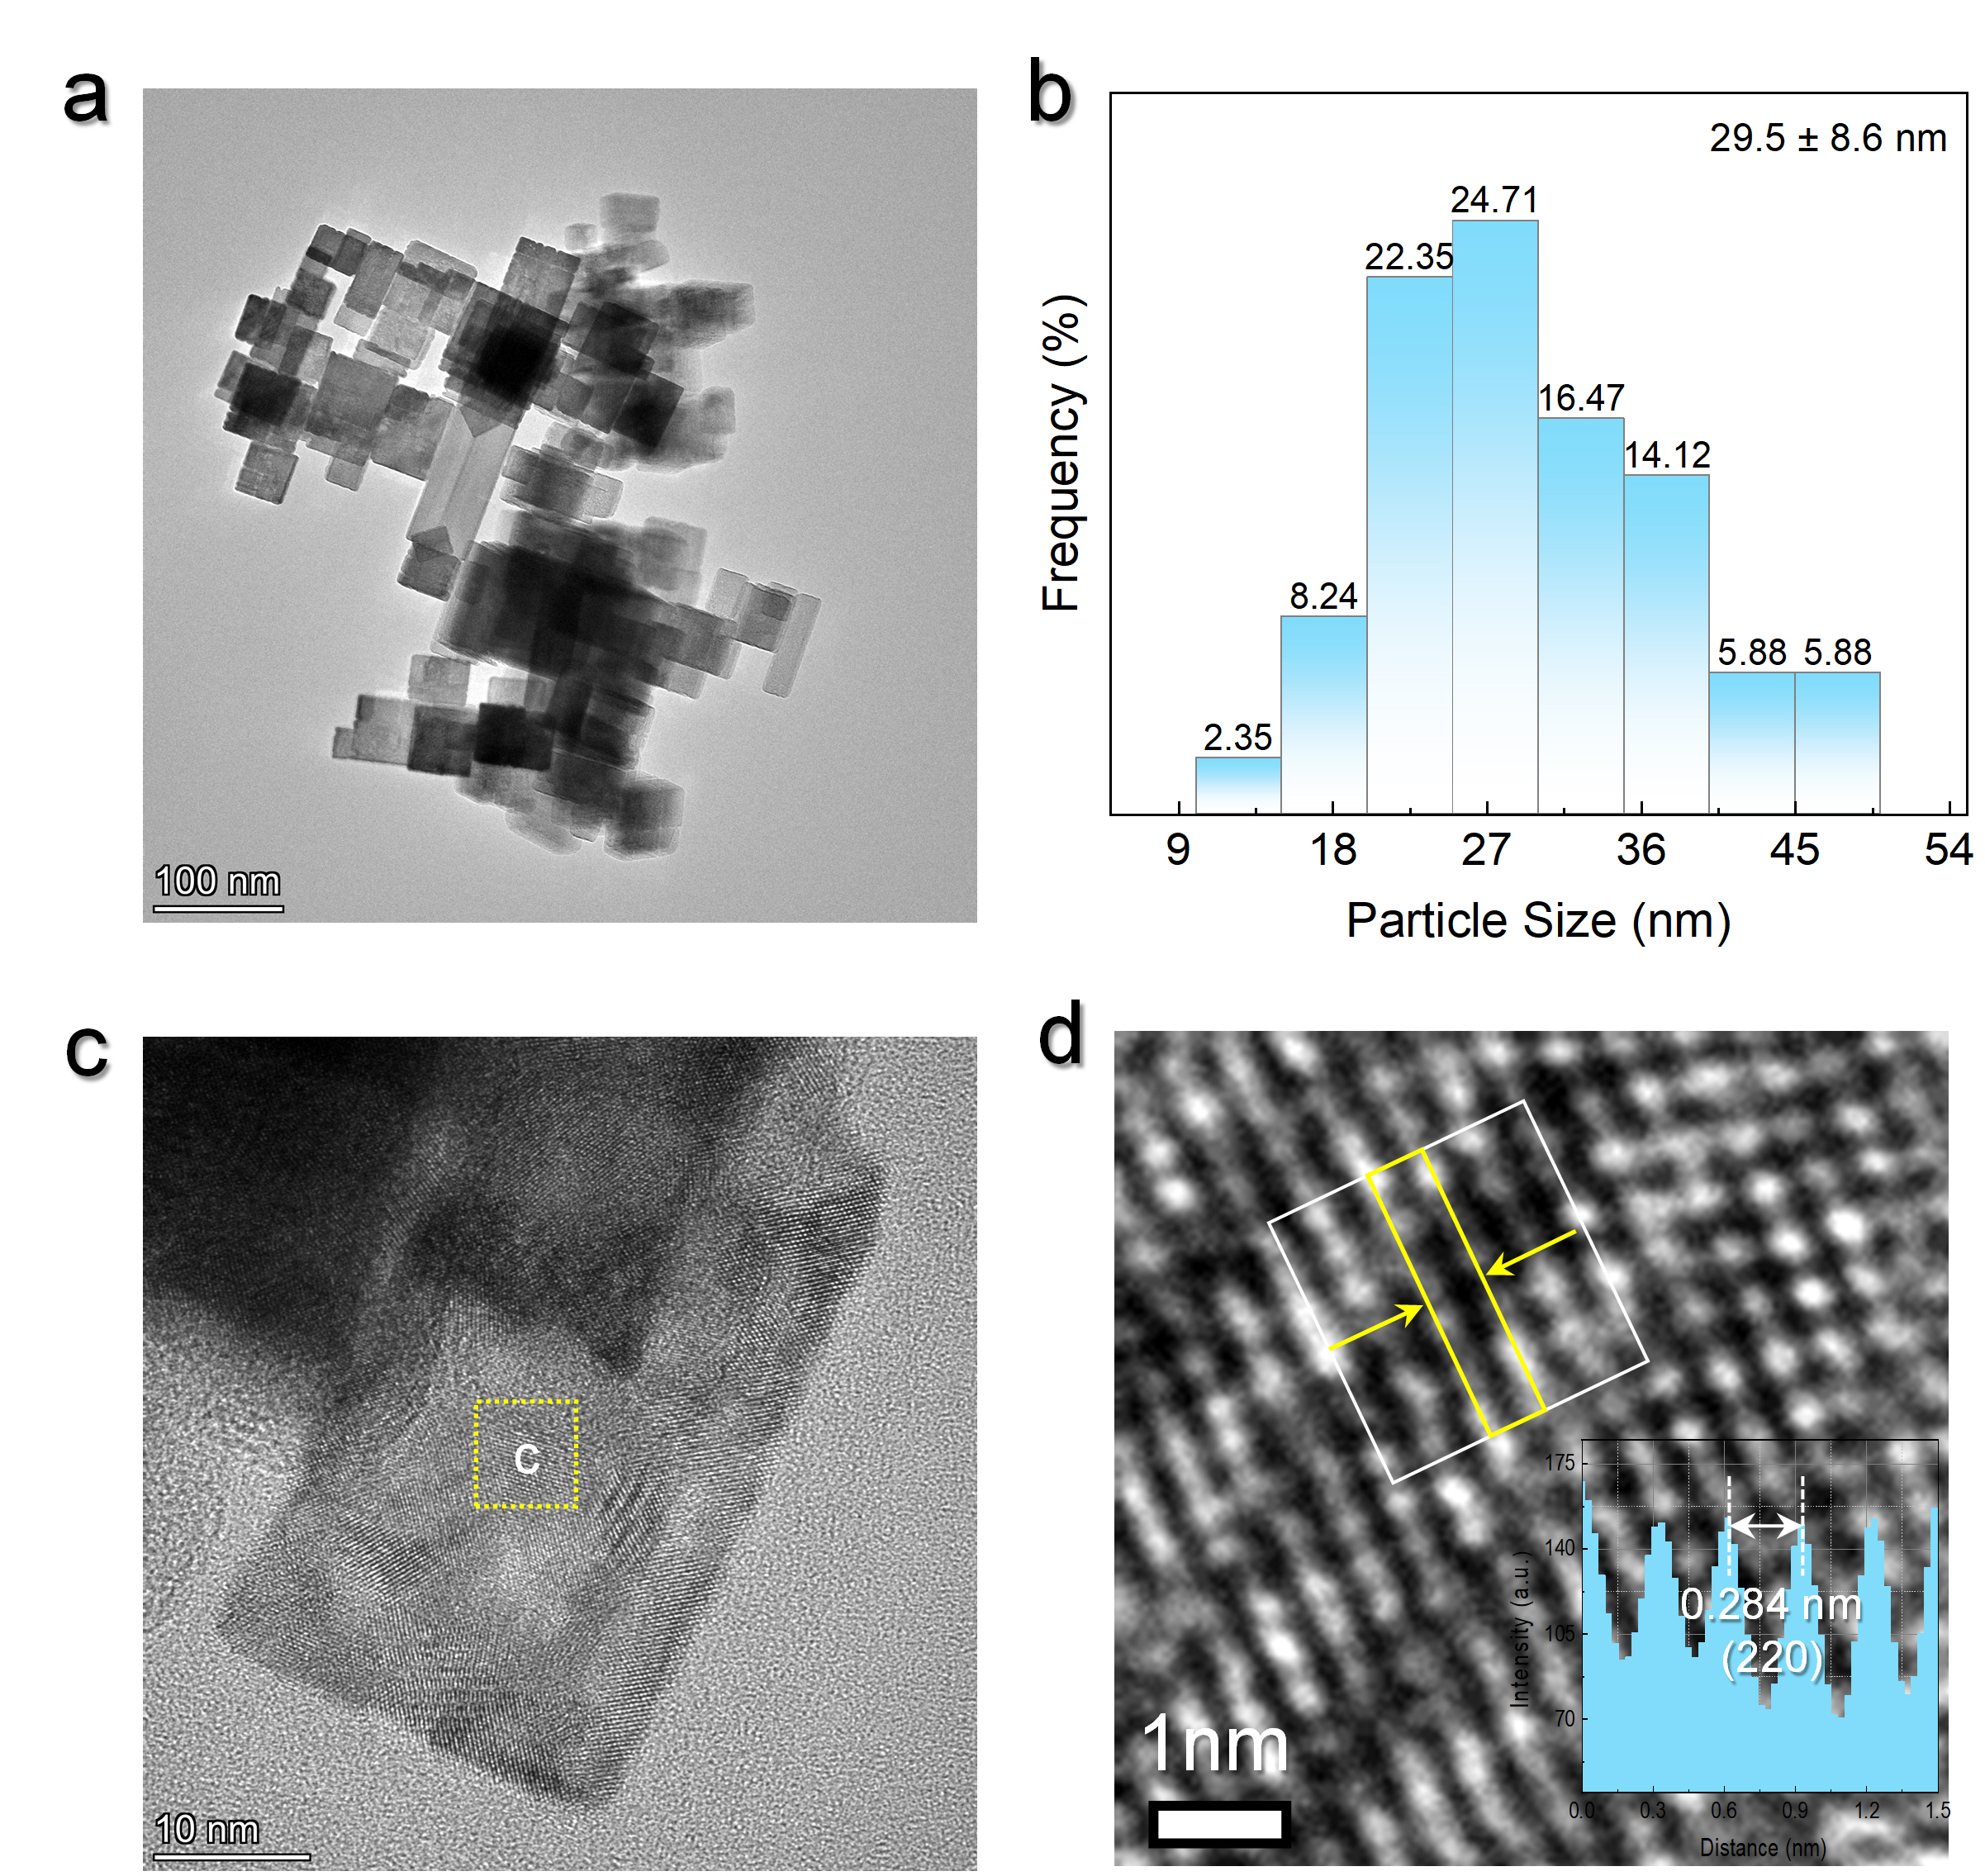


**Figure S6. Structural characterizations of the In(OH)3 precursors**. (**a**) TEM images and (**b**) size distribution of the In(OH)3 precursors. (**c**) High-resolution TEM image and (**d**) Intensity profiles crystal plane spacing of the In(OH)3 precursors.


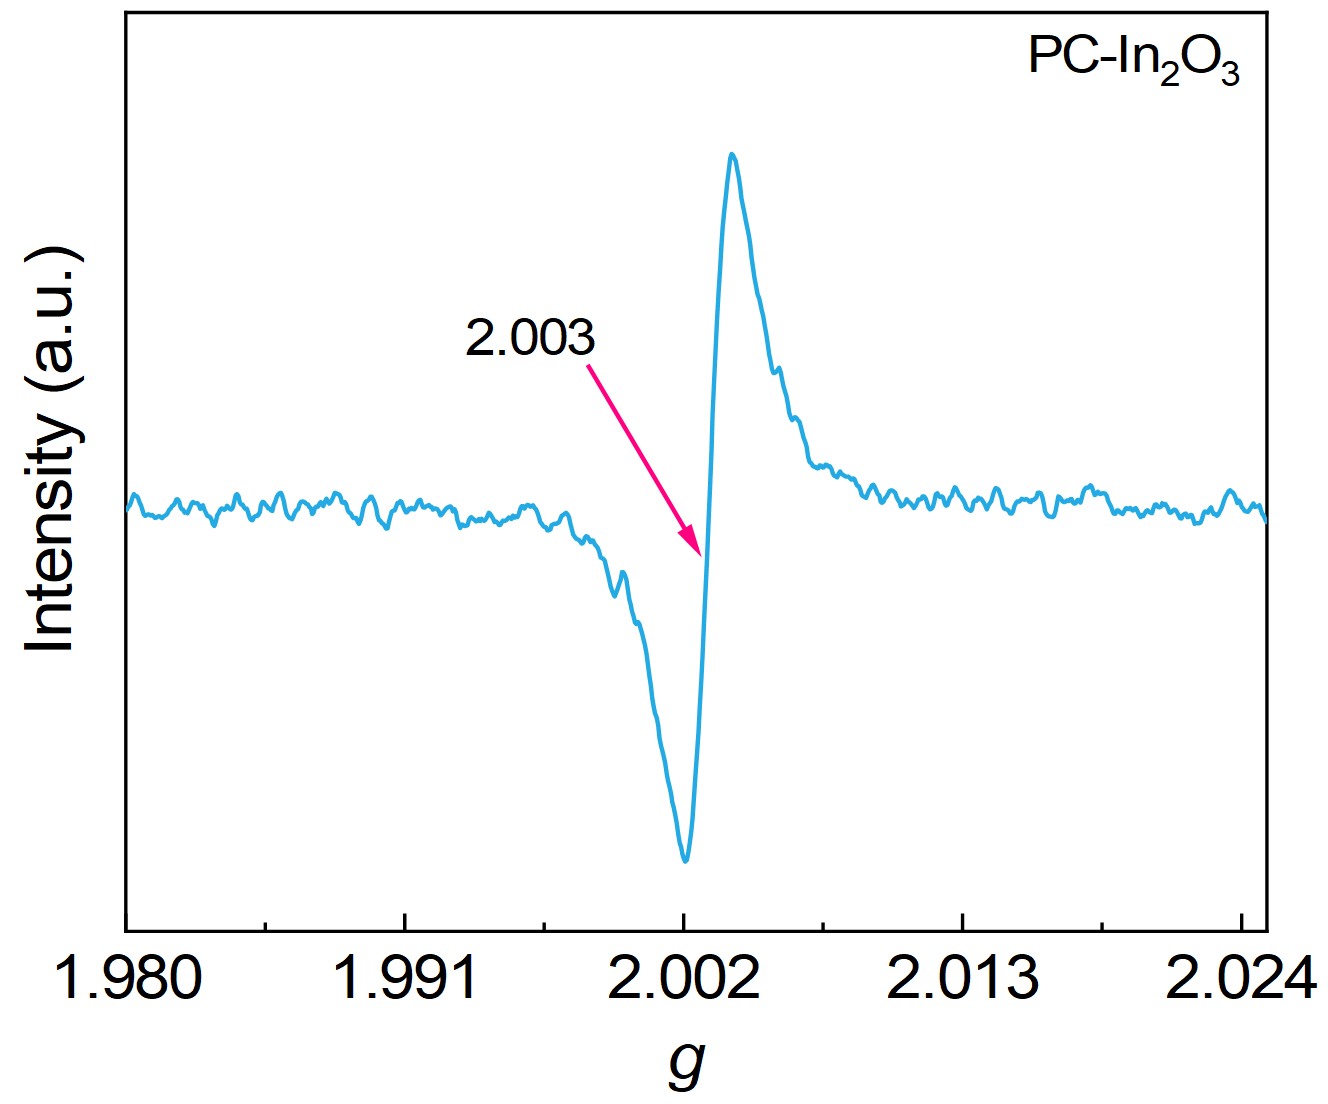


**Figure S7. The EPR spectrum of the PC-In2O3 catalysts**


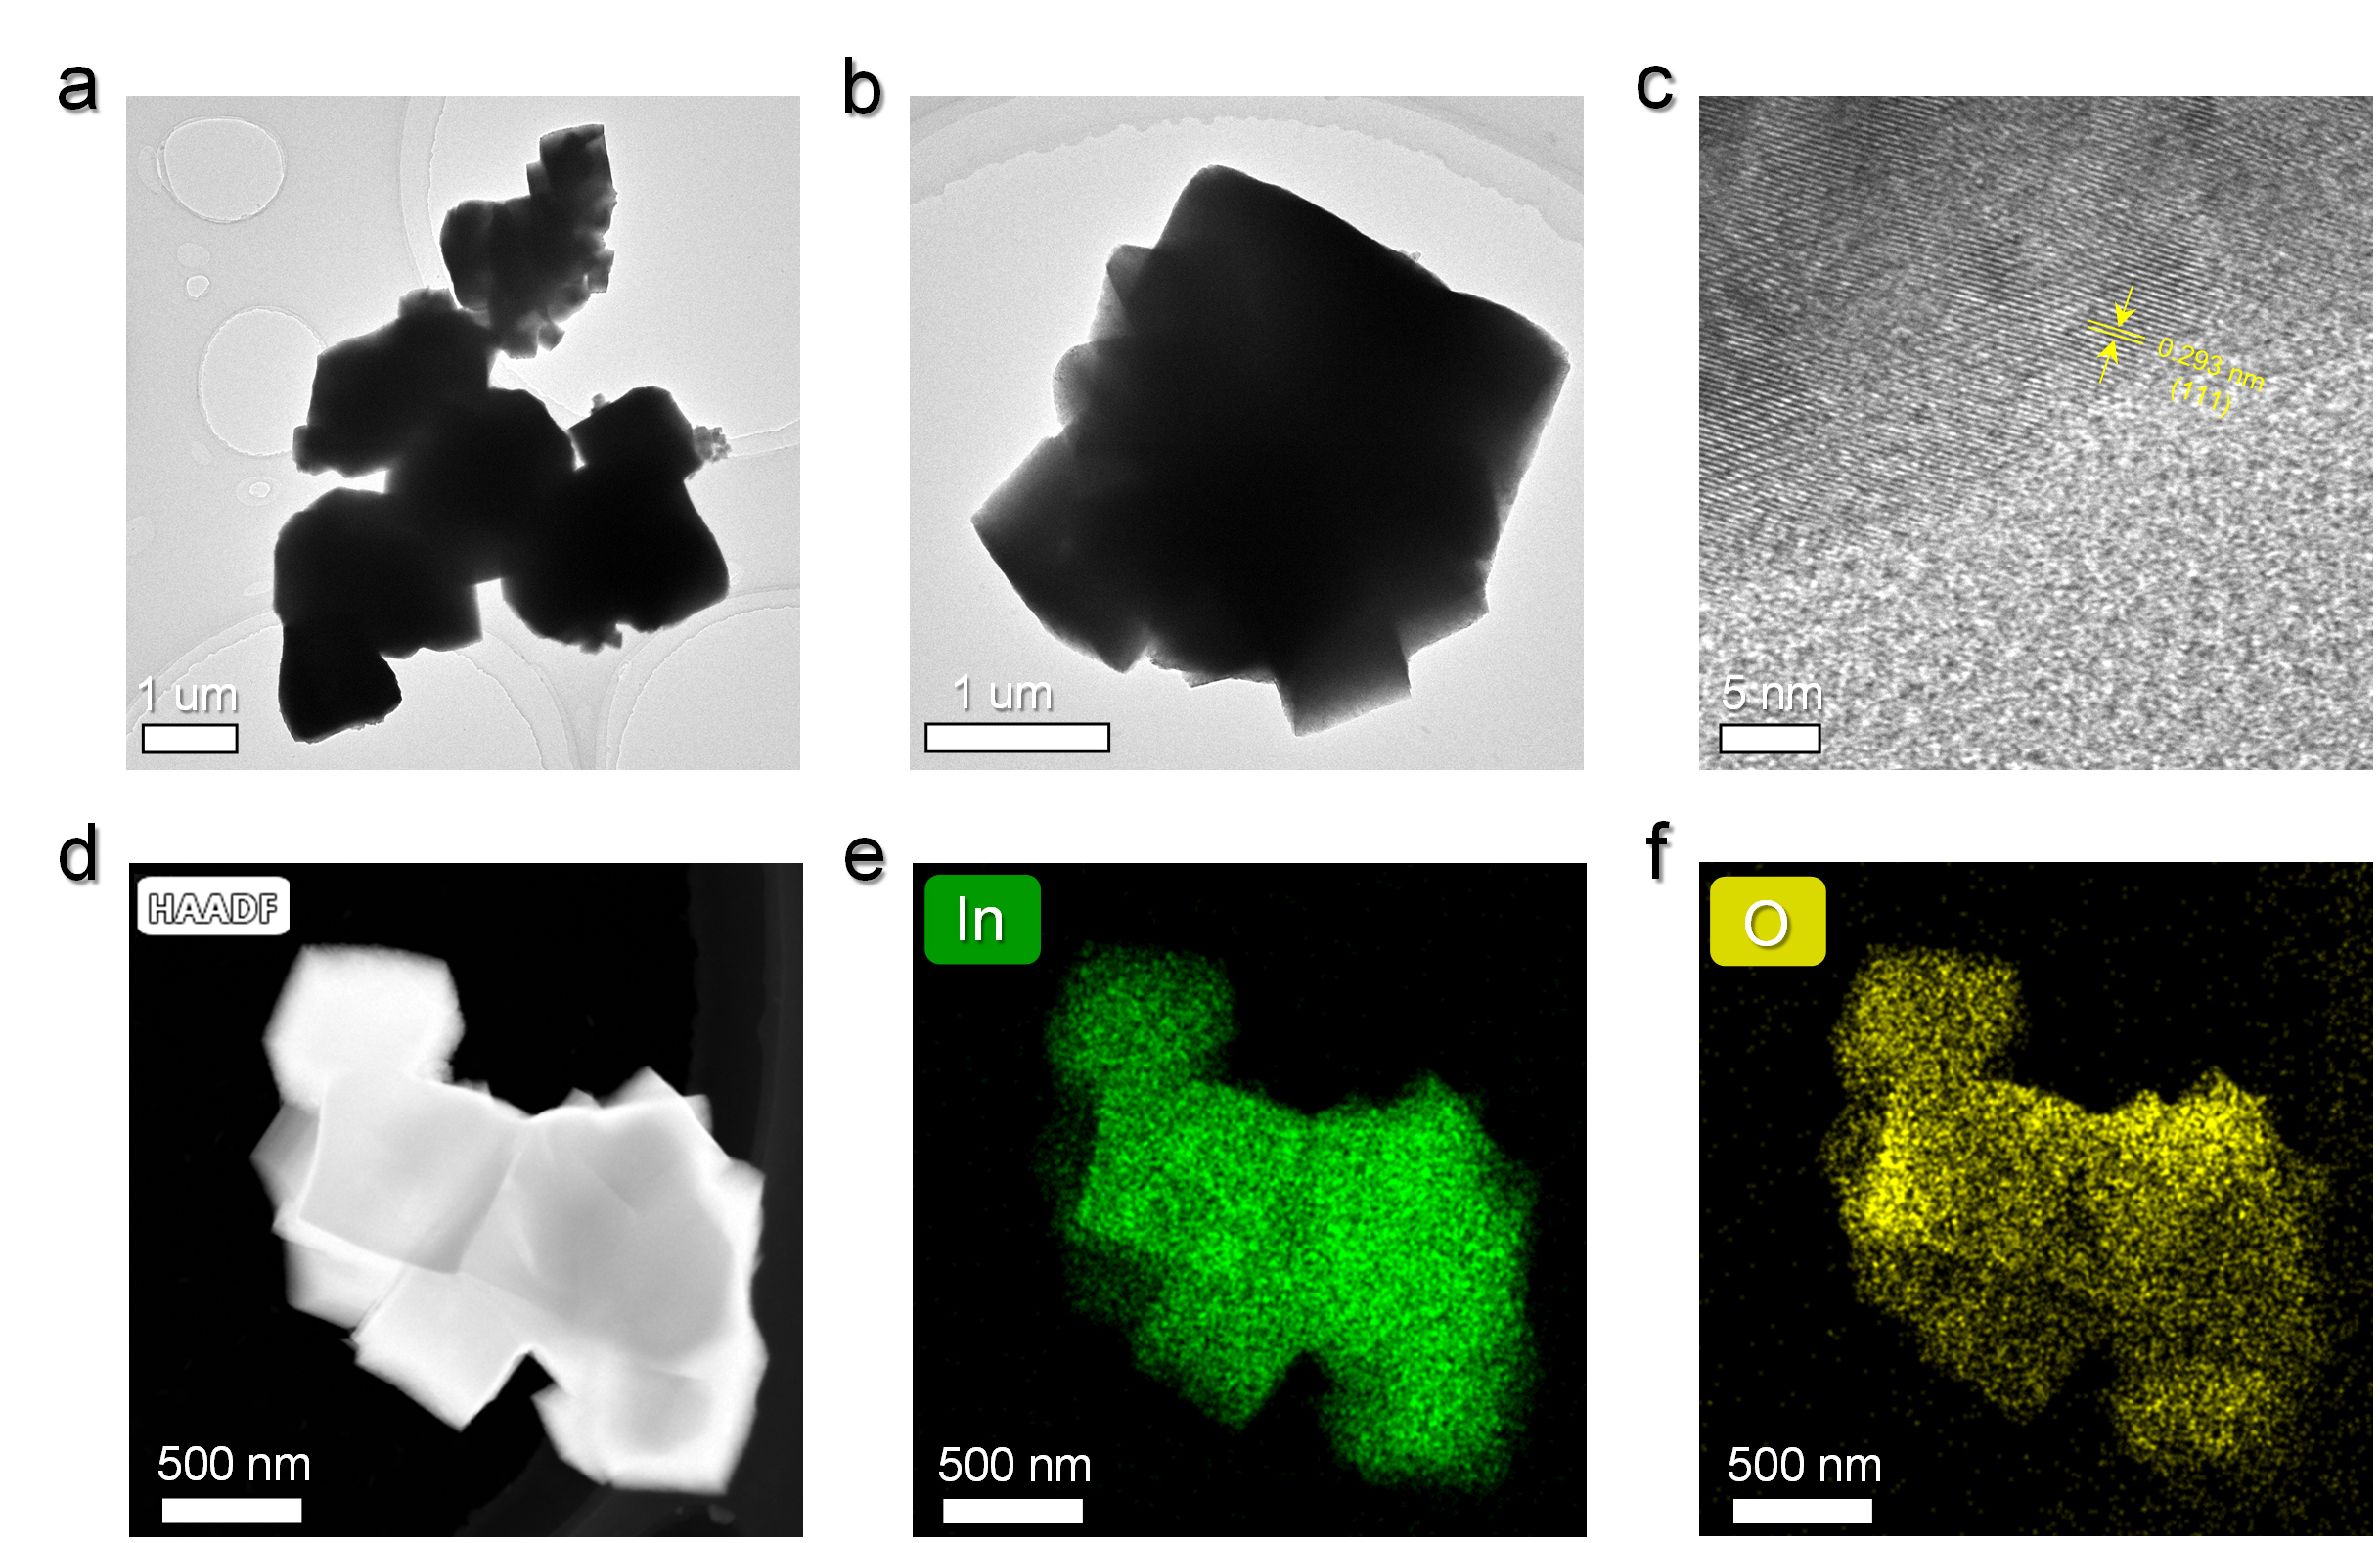


**Figure S8. Structural characterizations of NP-In2O3.** (**a, b**) TEM and (**c**) HRTEM images of NP-In2O3. (**d**) HAADF-STEM image and corresponding EDS elemental mappings of (**e**) In and (**f**) O elements for NP-In2O3.


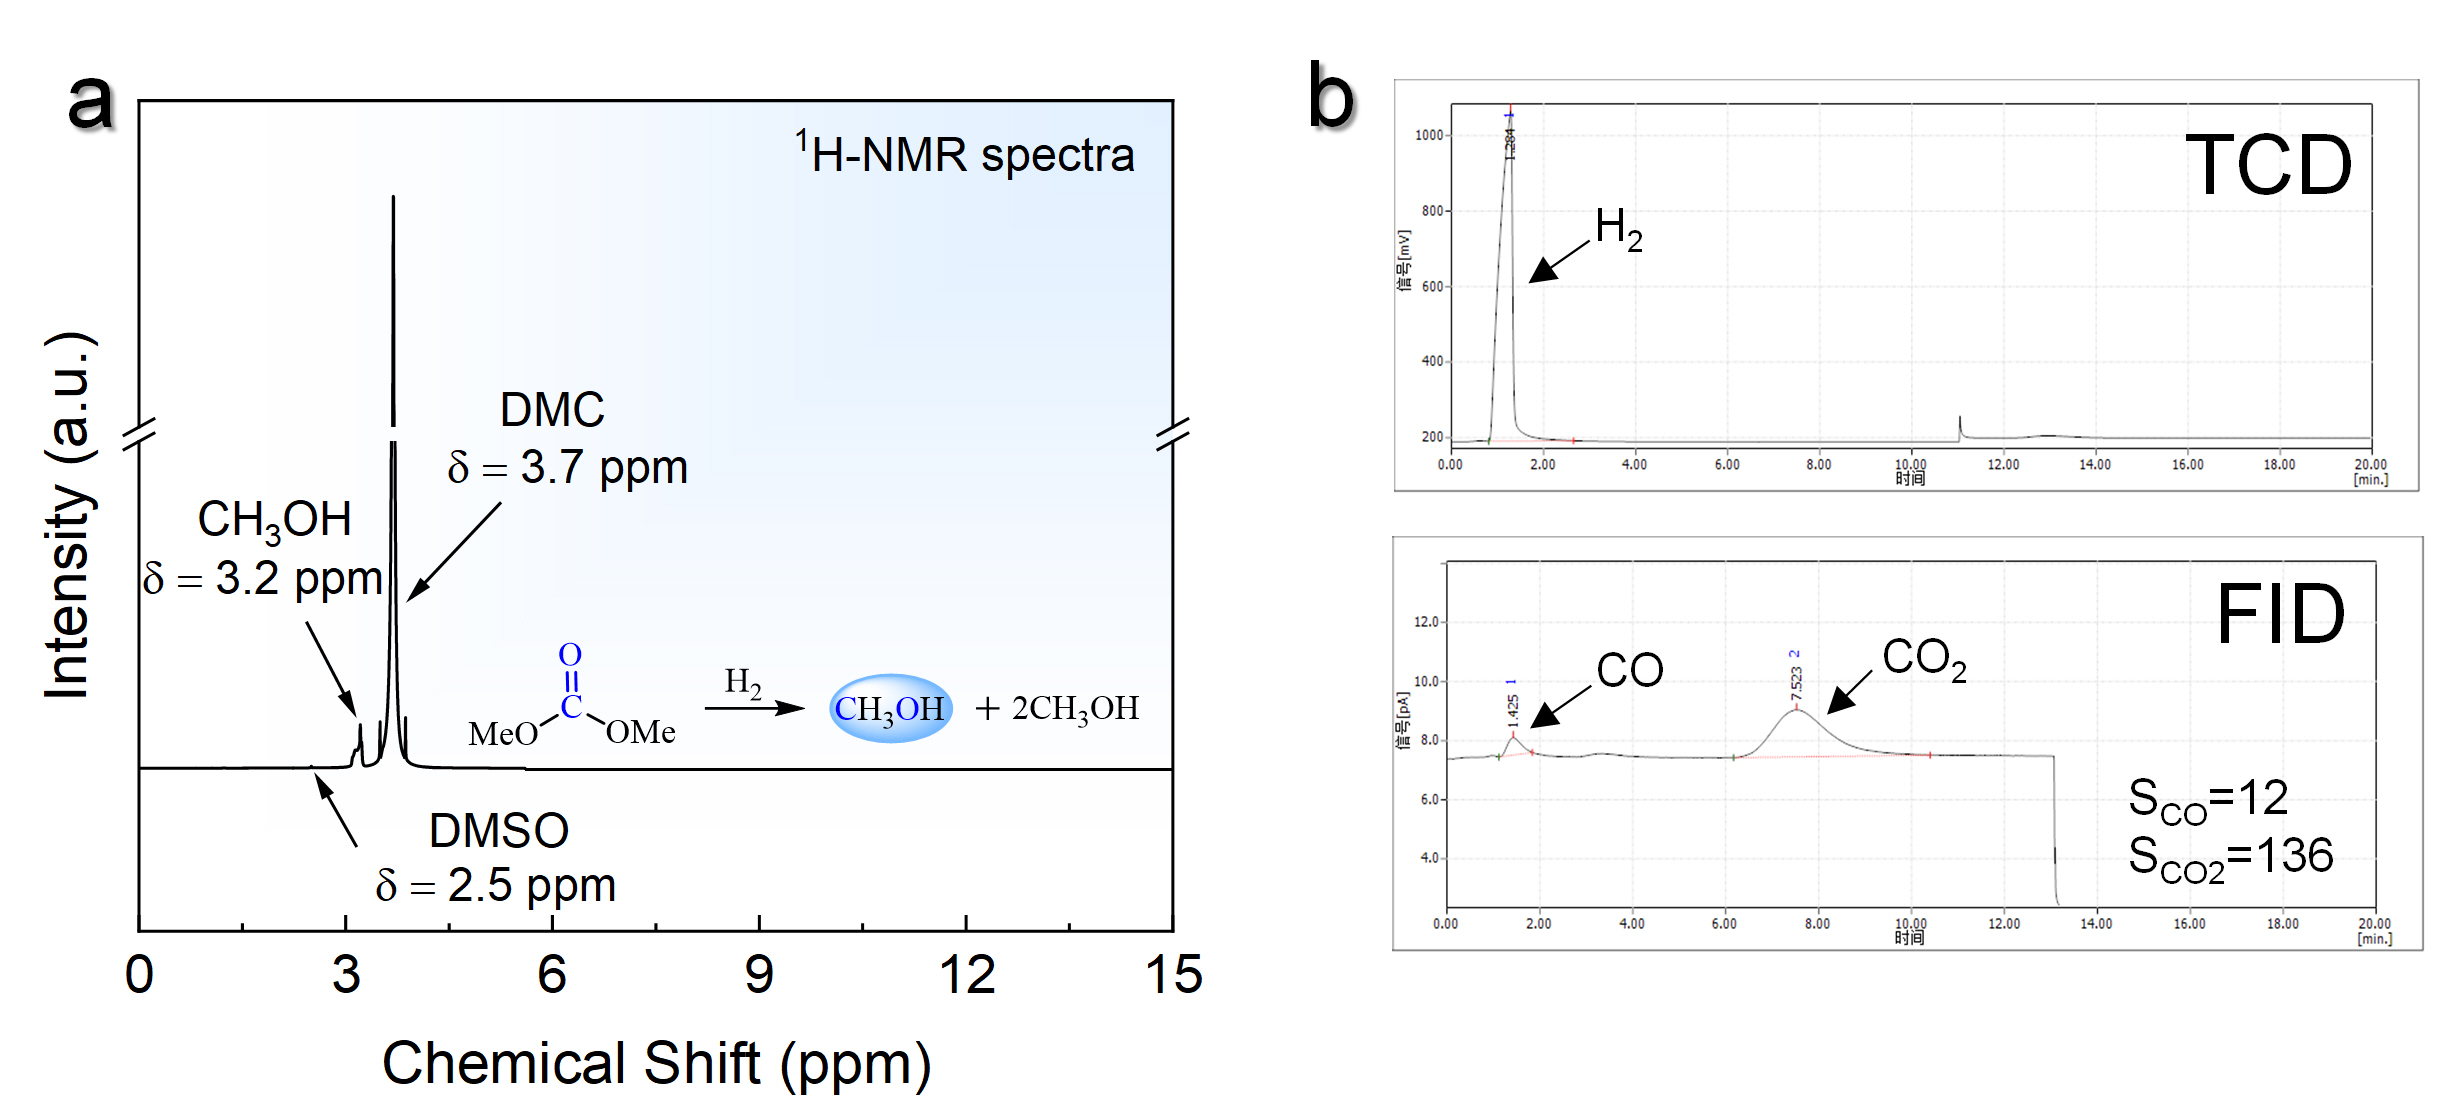


**Figure S9. Product analysis.** (**a**) The 1H-NMR spectra of the liquid phase products. (**b**) Gas chromatography analysis of gas phase products.


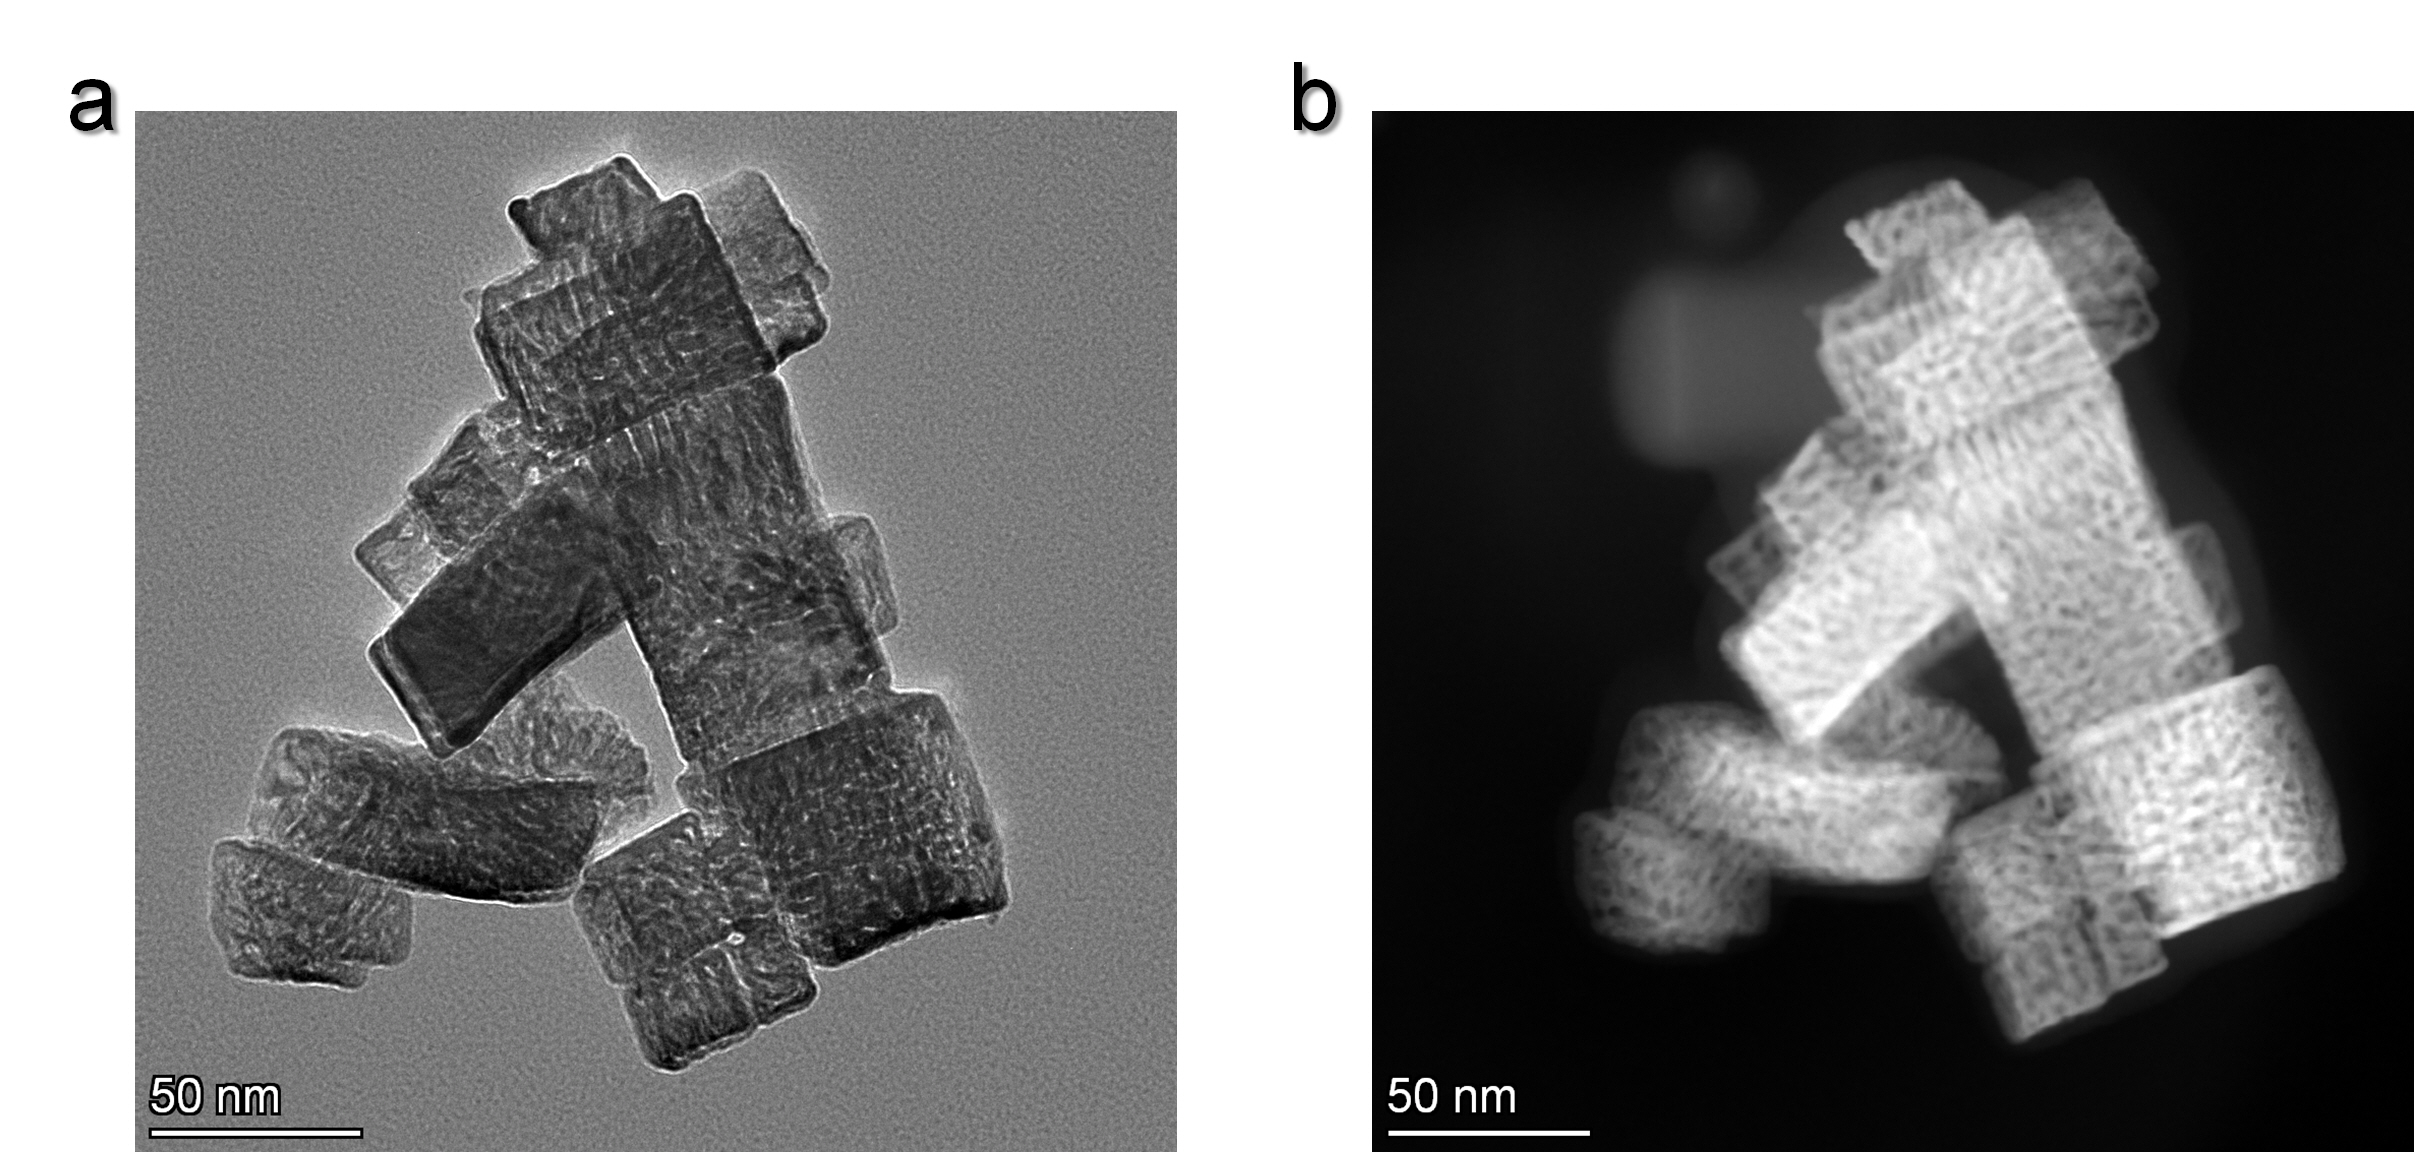


**Figure S10. Structural characterizations of the spent PC-In2O3 catalysts.**

**
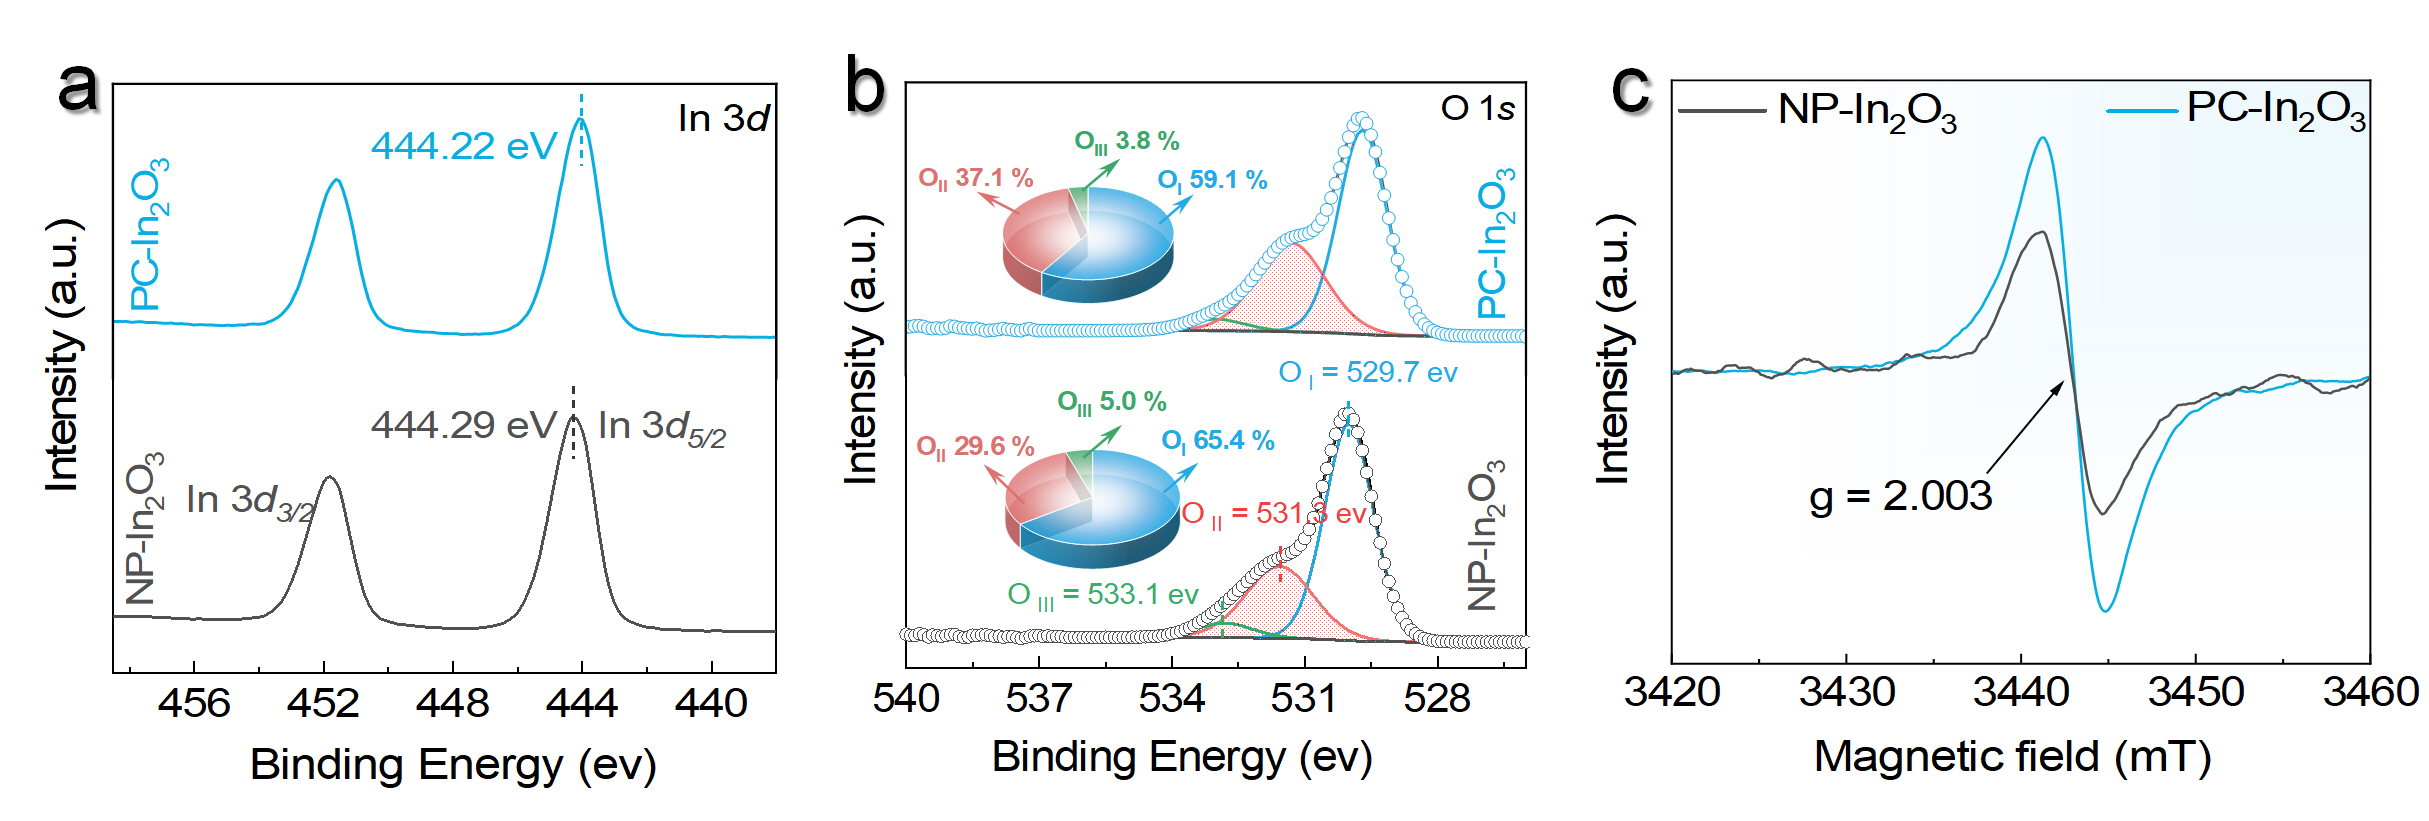
**

**Figure S11. Electronic structures and oxygen vacancy characterizations of NP-In2O3 and PC-In2O3.** (**a**) In 3*d* and (**b**) O1*s* XPS spectra of the NP-In2O3 and PC-In2O3 catalysts. (**c**) EPR spectra of the NP-In2O3 and PC-In2O3 catalysts at room temperature.

**
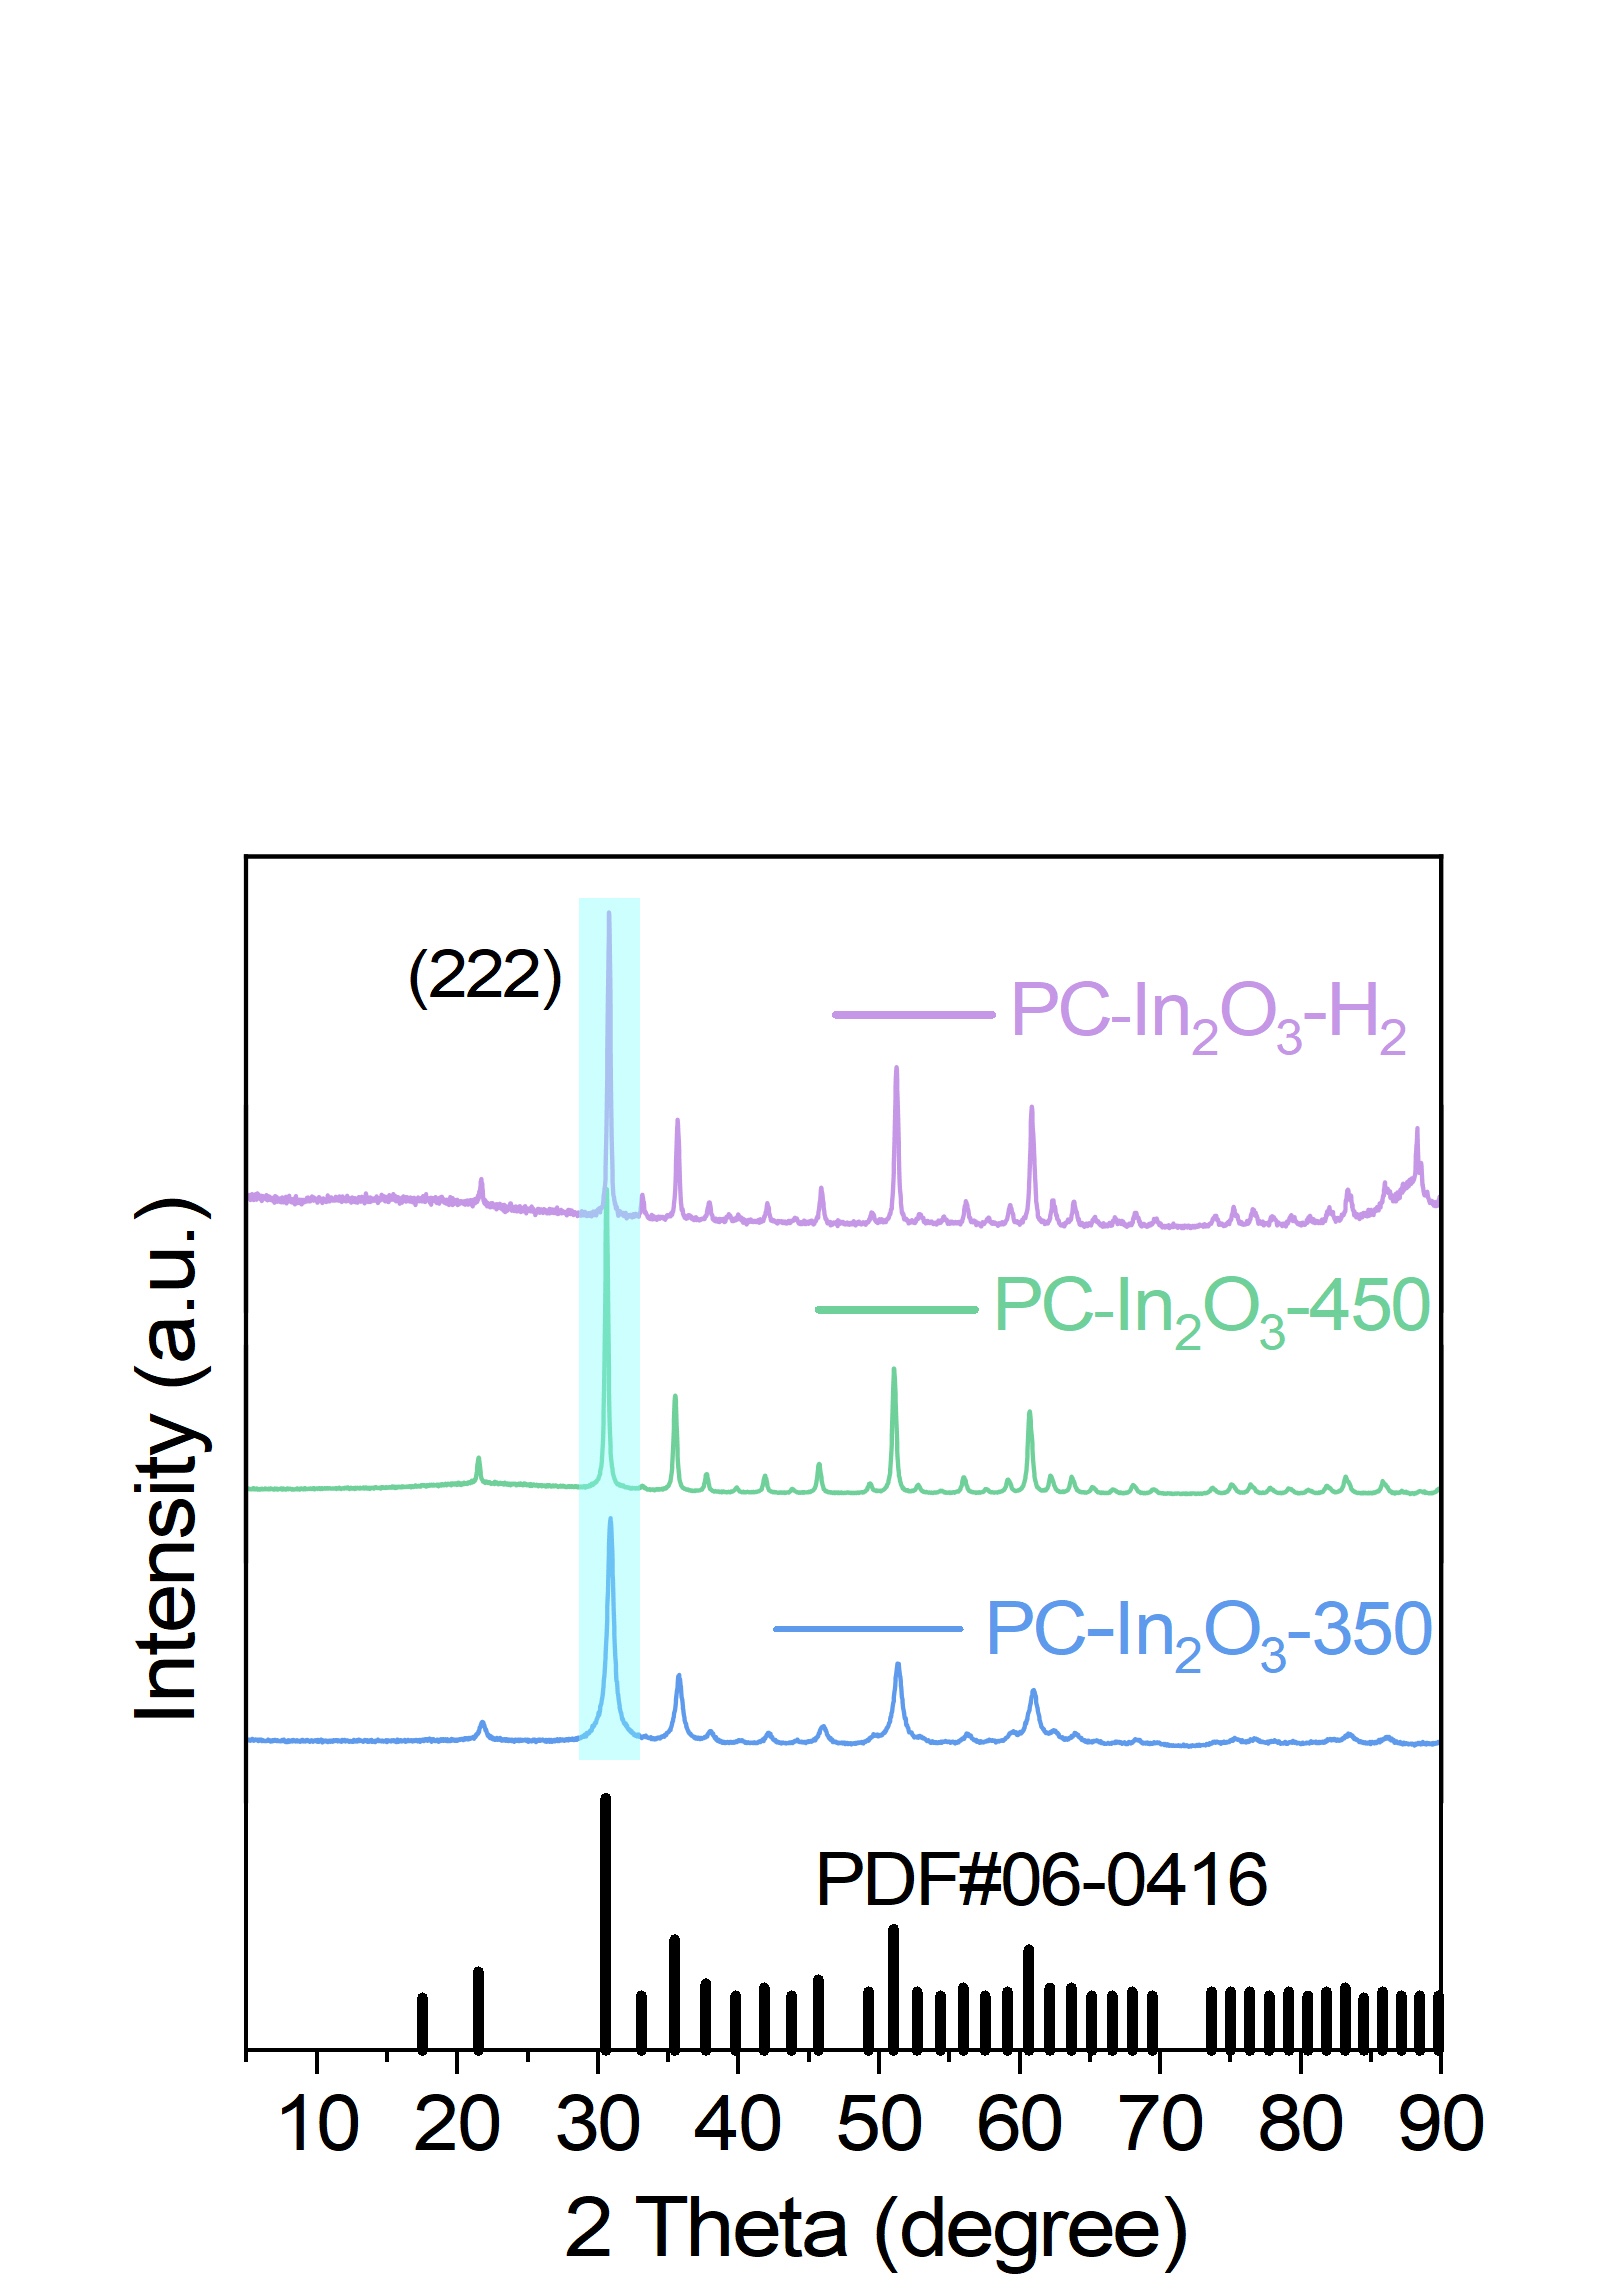
**

**Figure S12. XRD patterns of the PC-In2O3-350, PC-In2O3-450 and PC-In2O3-H2 catalysts.**


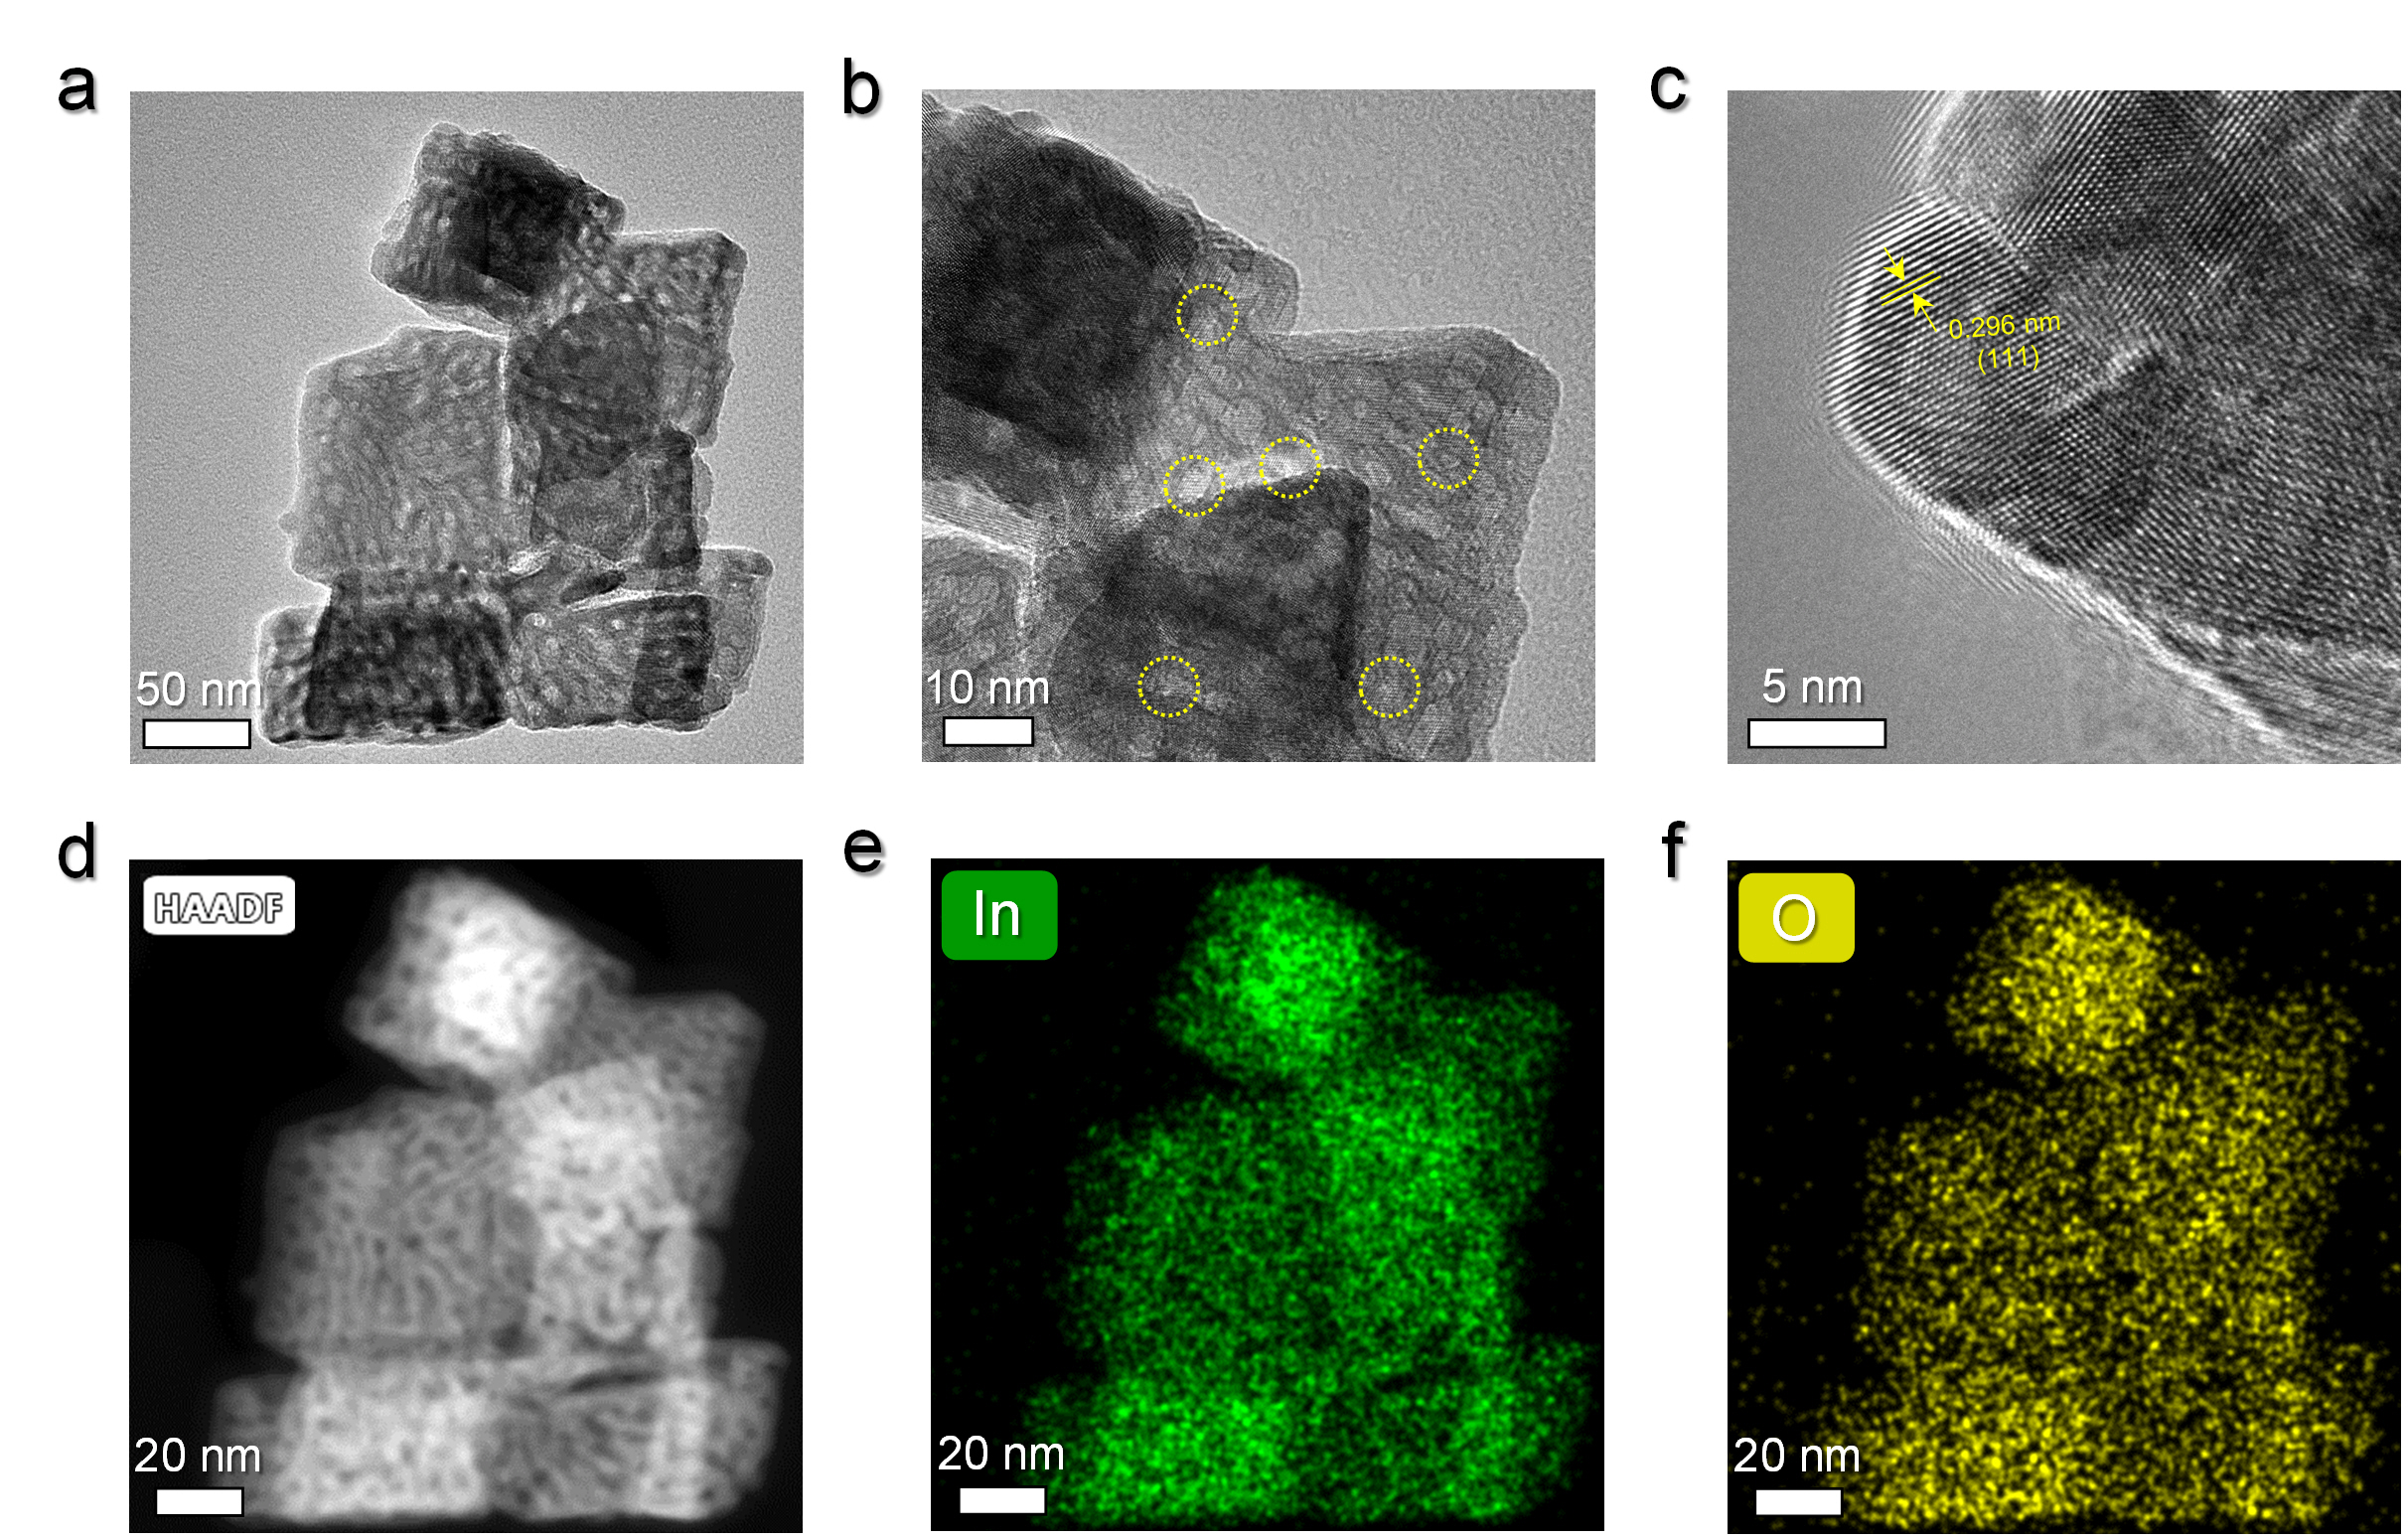


**Figure S13. Structural characterizations of PC-In2O3-350.** (**a, b**) TEM and (**c**) HRTEM images of the PC-In2O3-350 catalysts. (**d**) HAADF-STEM image and EDS elemental mappings of (**e**) In and (**f**) O elements for the PC-In2O3-350 catalysts.


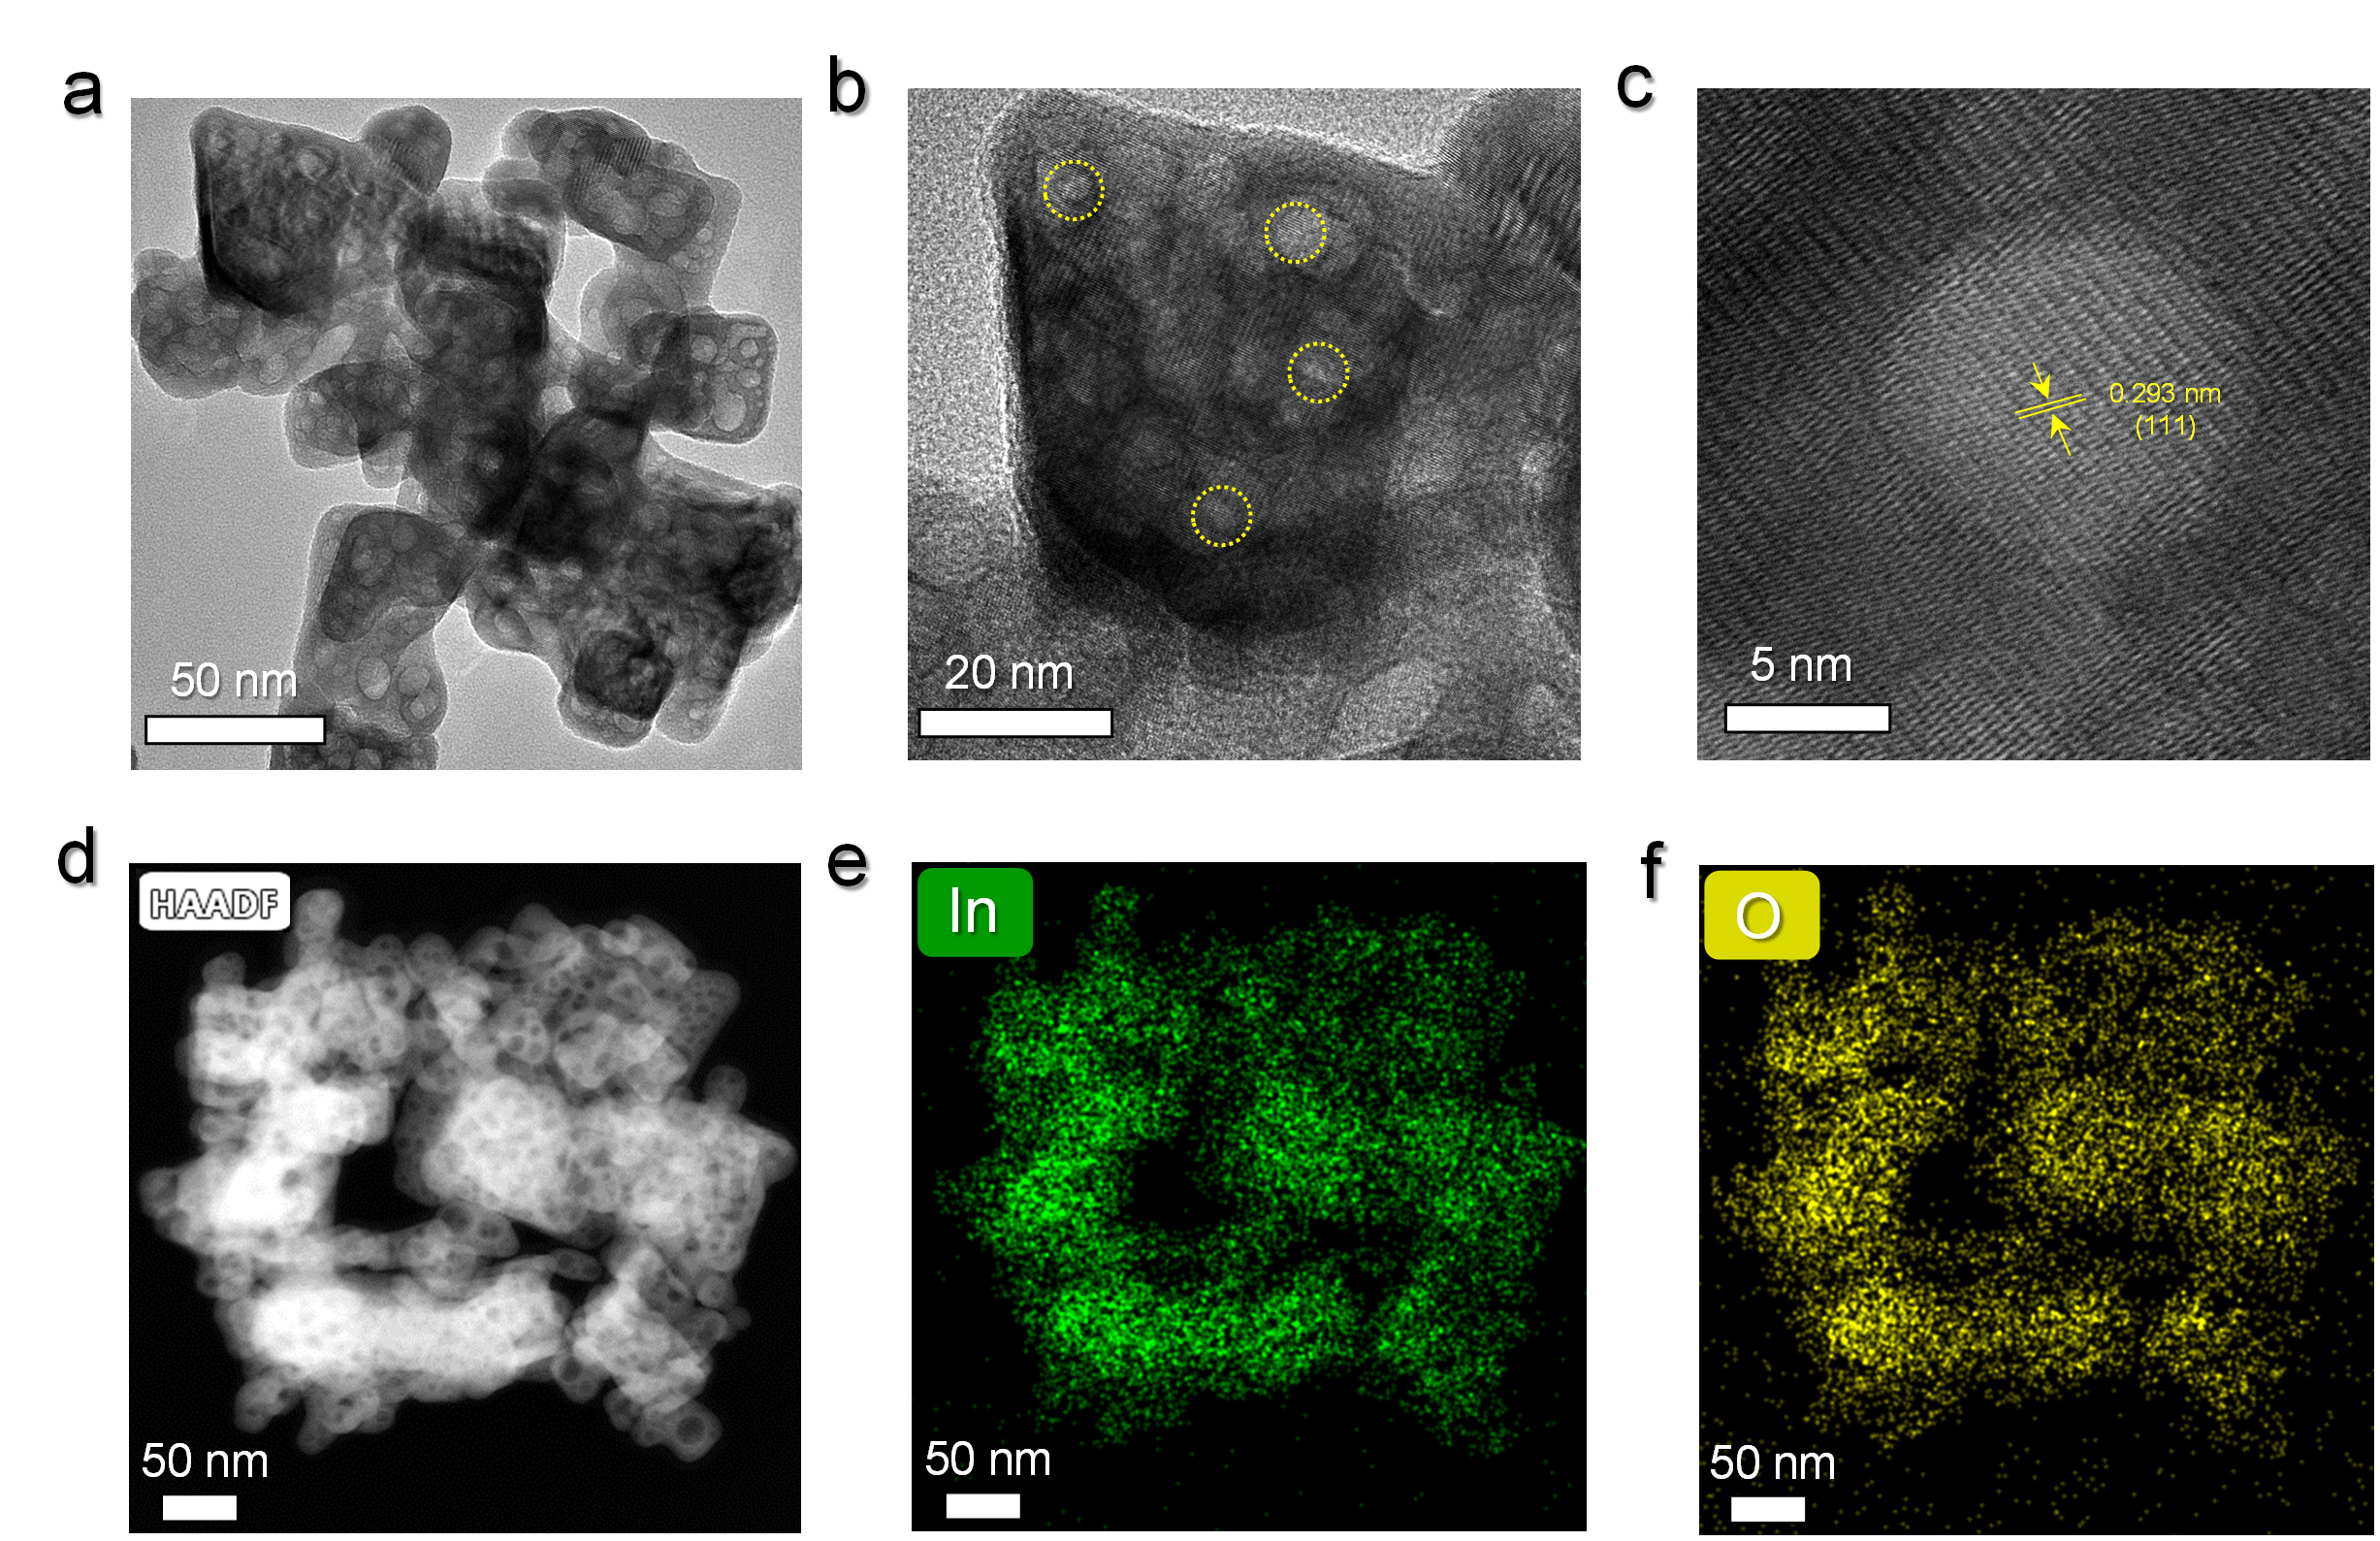


**Figure S14. Structural characterizations of PC-In2O3-450.** (**a, b**) TEM and (**c**) HRTEM images of the PC-In2O3-450 catalysts. (**d**) HAADF-STEM image and EDS elemental mappings of (**e**) In and (**f**) O elements for the PC-In2O3-450 catalysts.

**
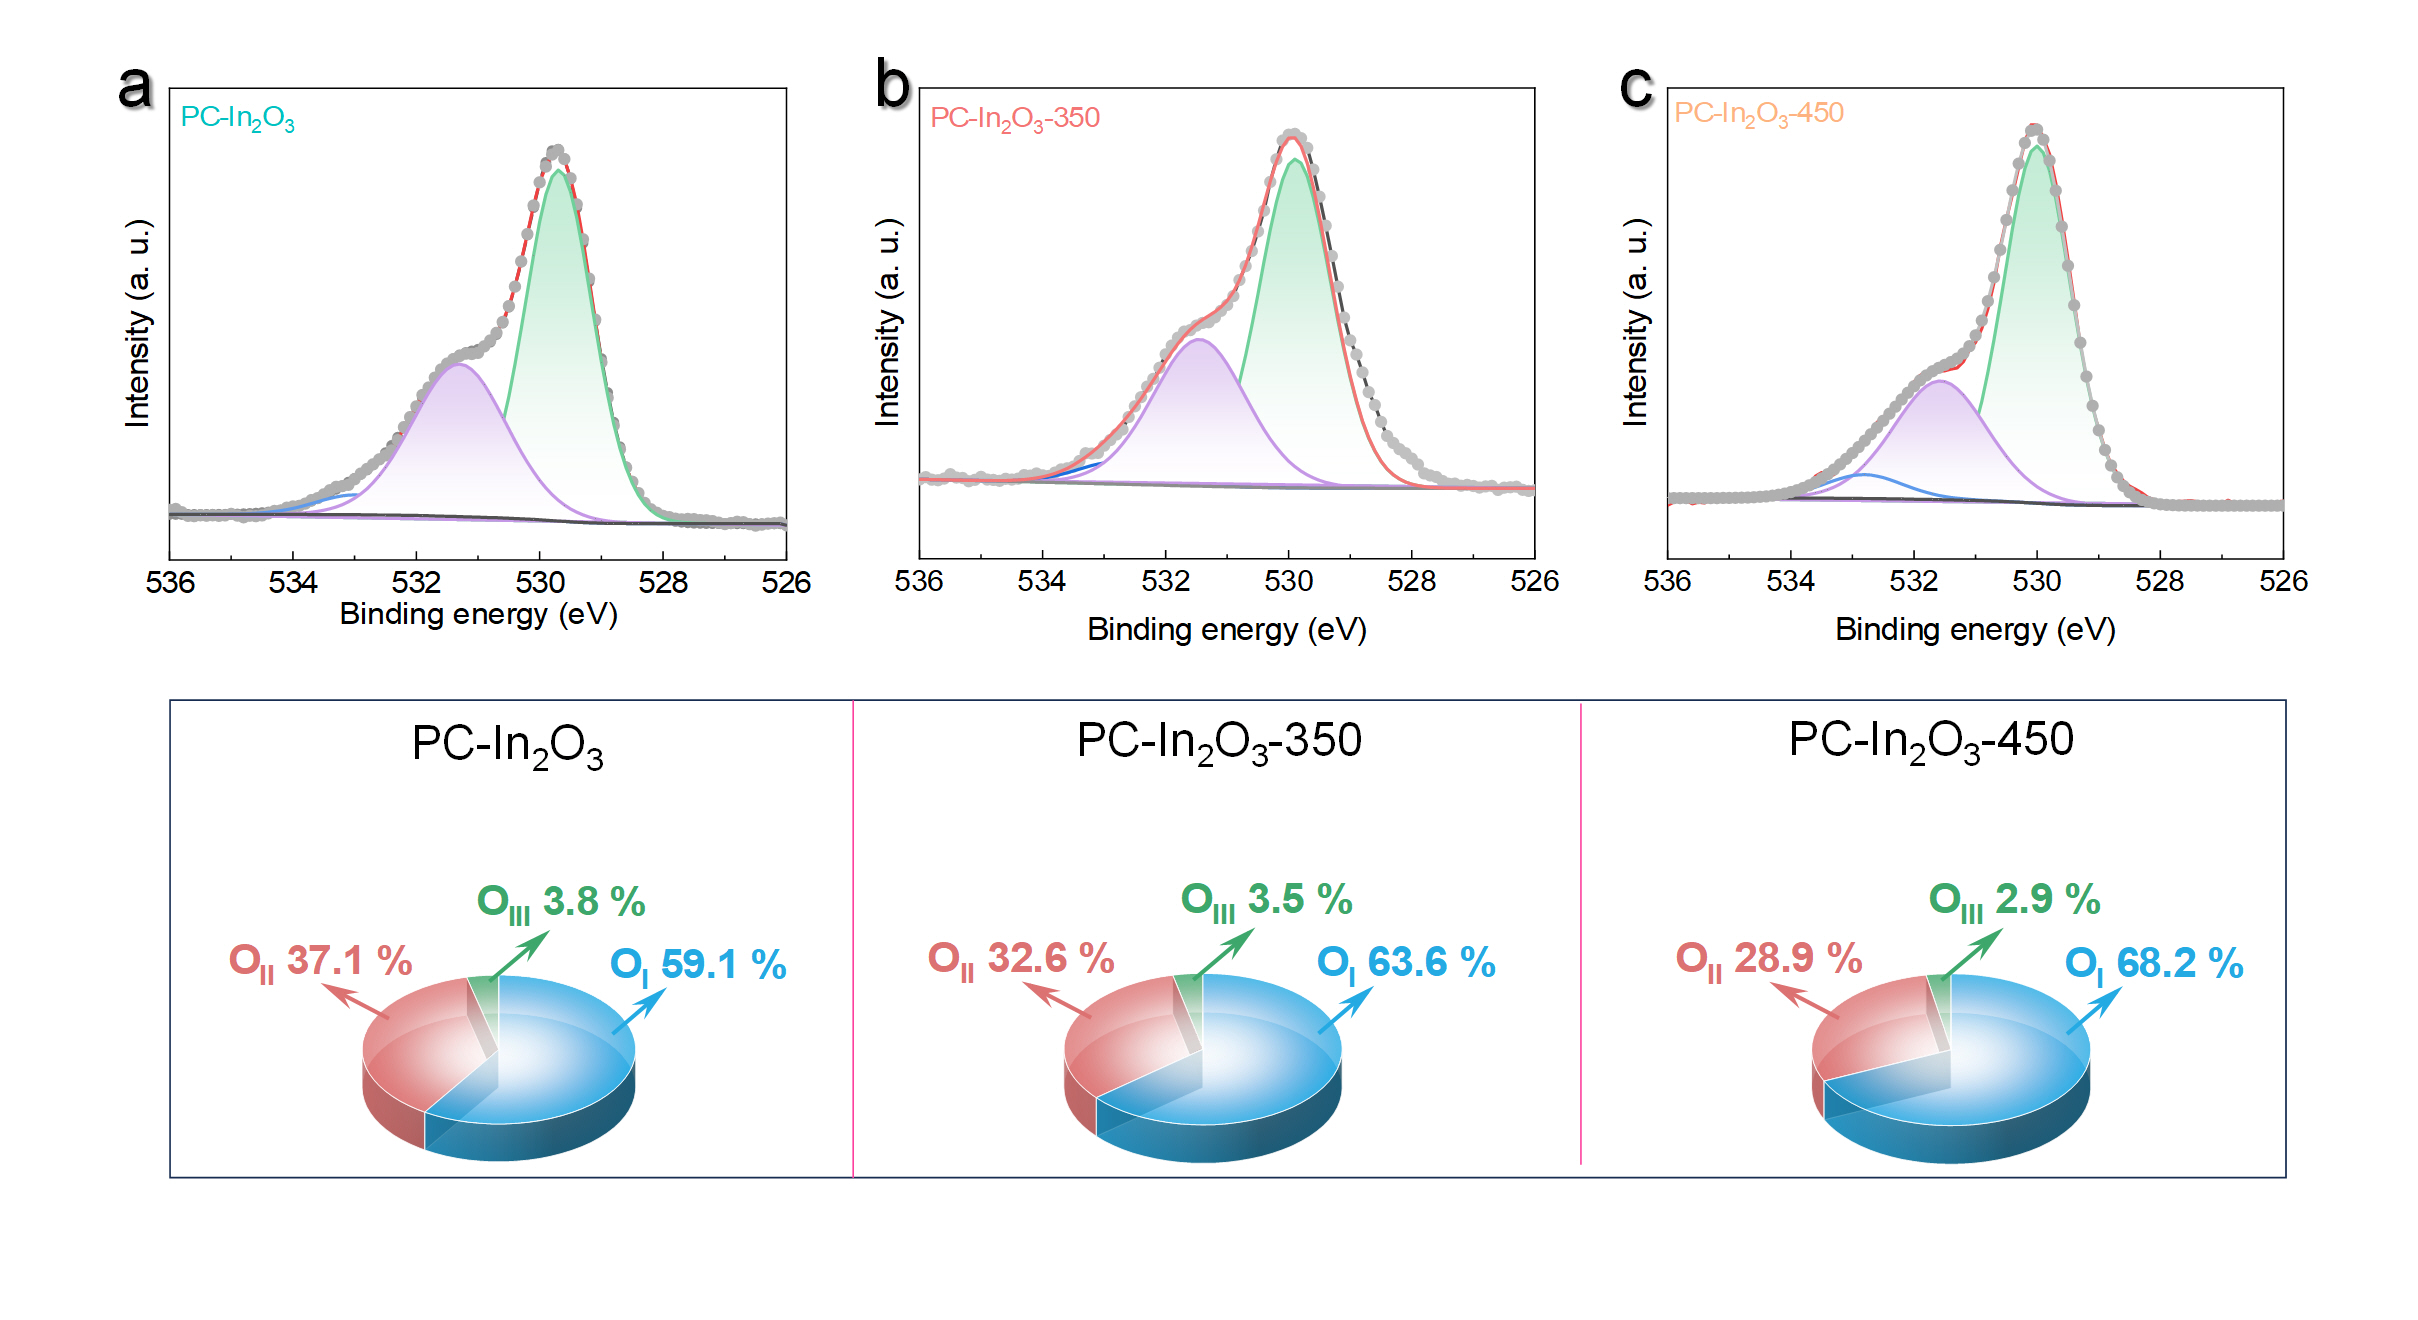
**

**Figure S15. Oxygen vacancy characterizations.** XPS analysis of O *1s* profiles of the (**a**) PC-In2O3, (**b**) PC-In2O3-350 and (**c**)PC-In2O3-450 catalysts.

**
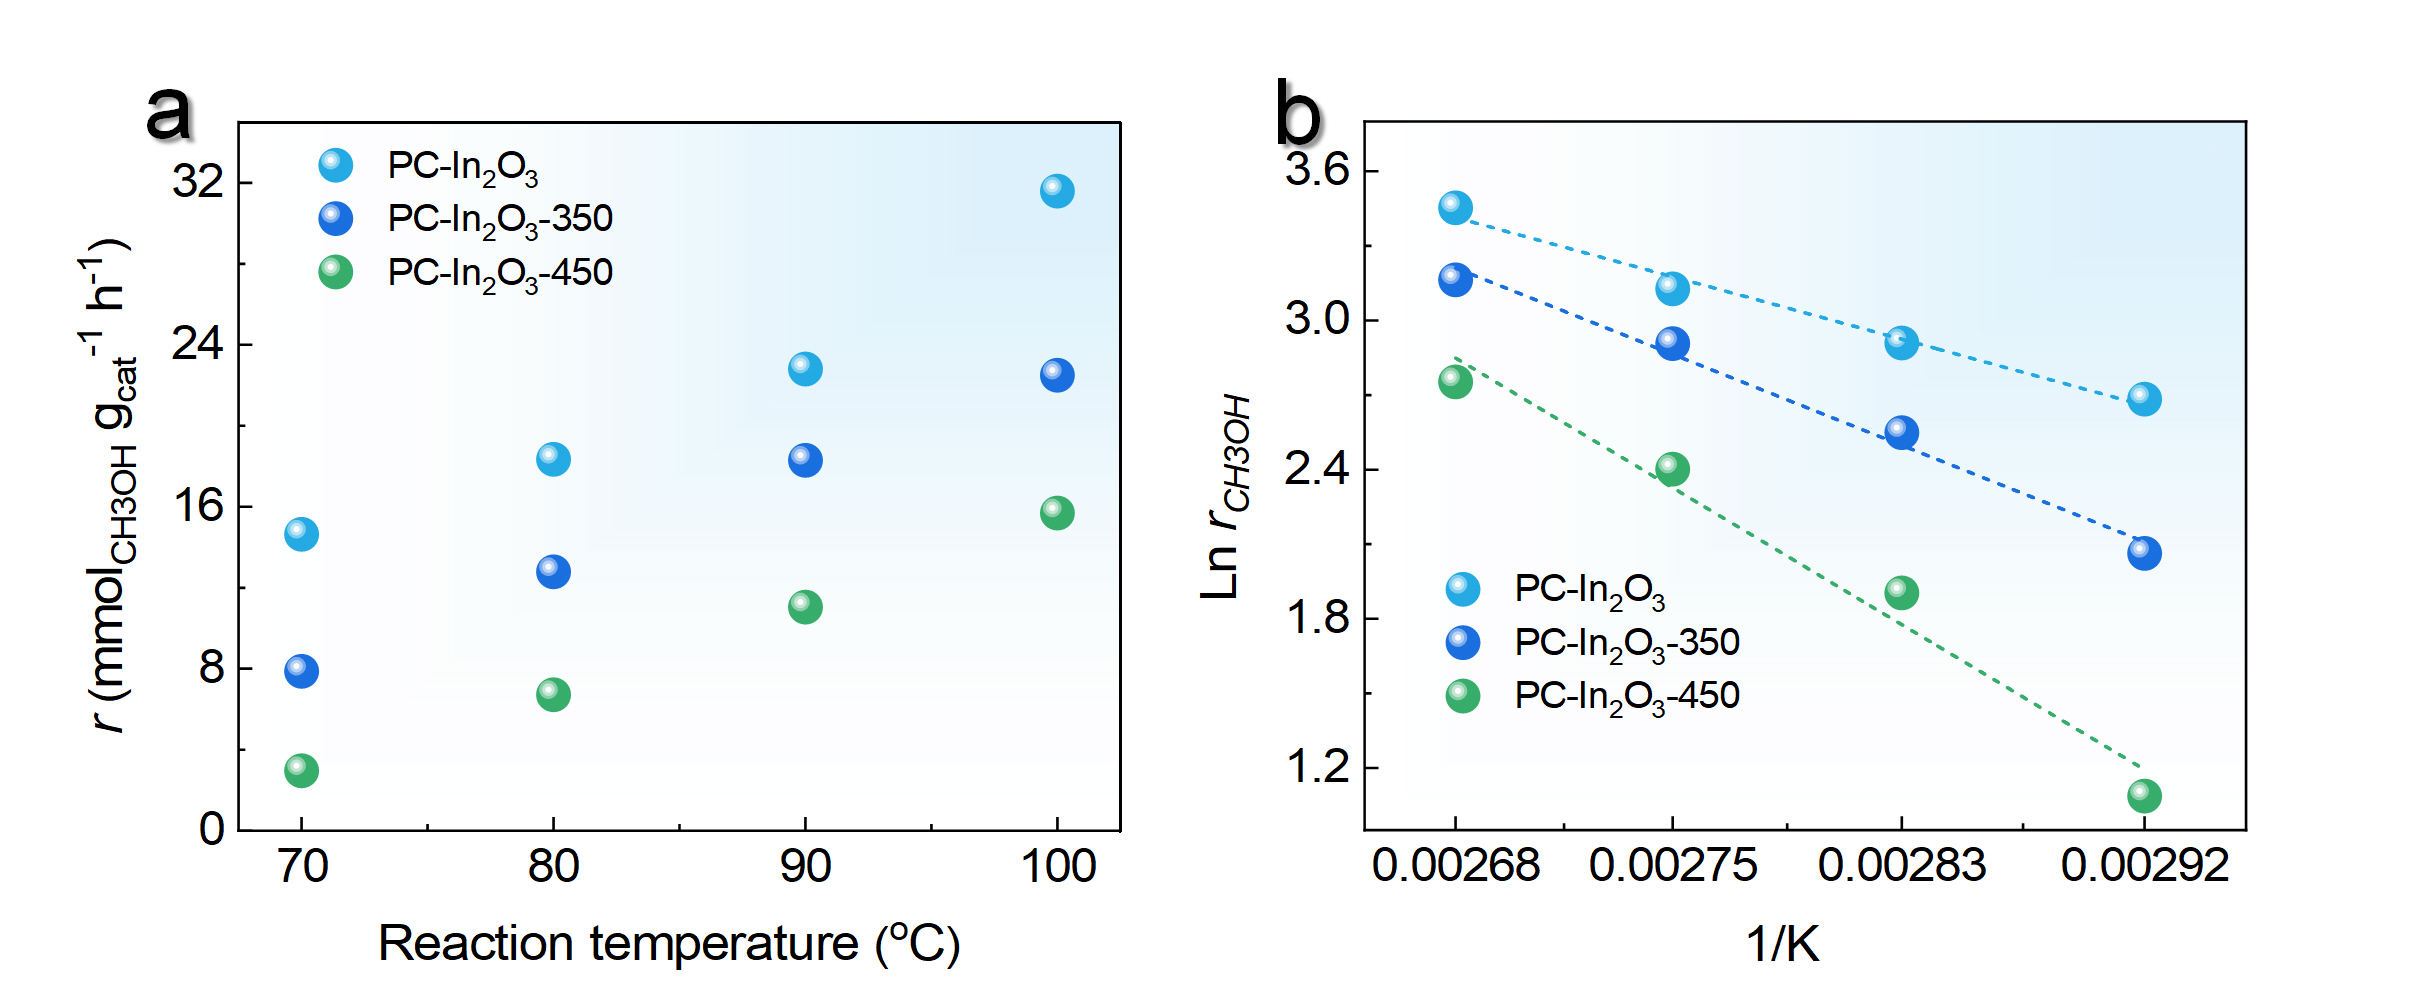
**

**Figure S16. Kinetics analysis of In2O3 for the DMC hydrogenation.** (**a**)MeOH production rates at various temperatures. (**b**)Corresponding Arrhenius curves. **Reaction conditions:** catalysts (20 mg), DMC (5 mL), 1 h, 100 ℃ and 2 MPa H2.

**
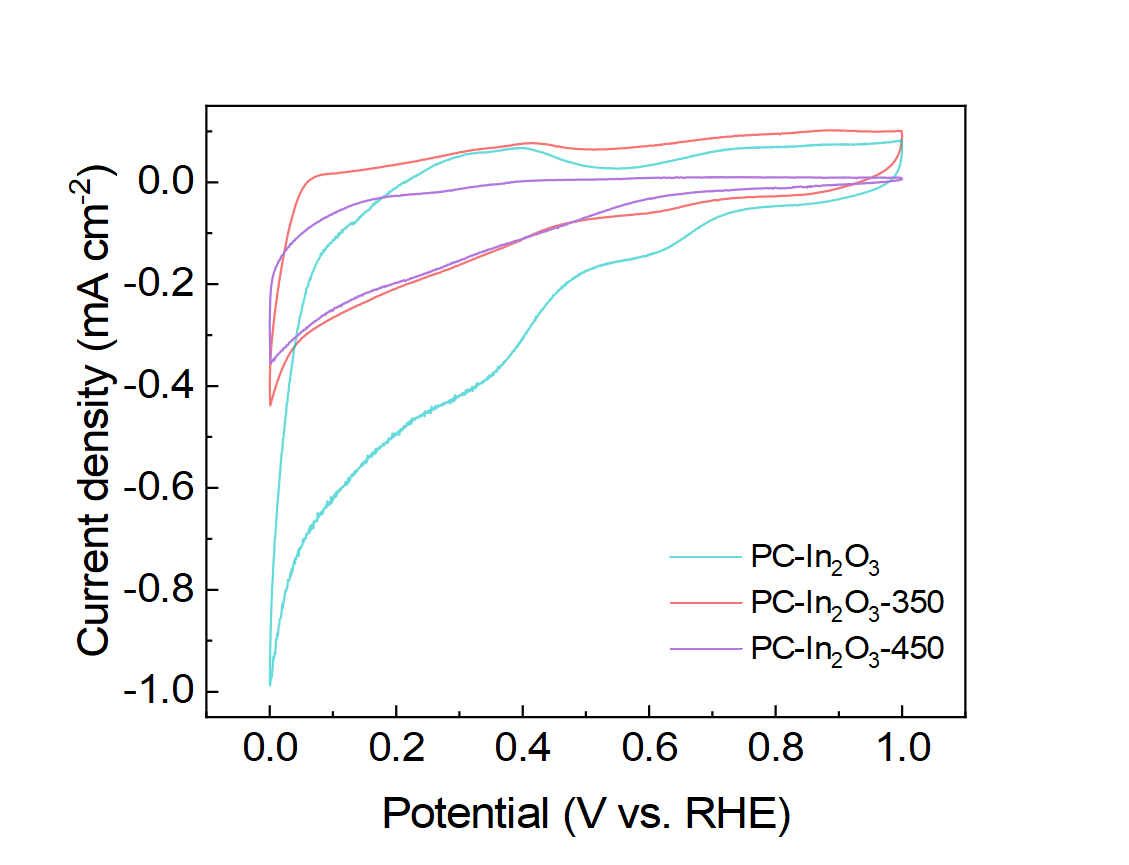
**

**Figure S17.** CV plots of PC-In2O3, PC-In2O3-350, and PC-In2O3-450. All CVs plots were collected in an H2-saturated 0.1 M KOH electrolyte at a scan rate of 20 mV s−1 at room temperature.


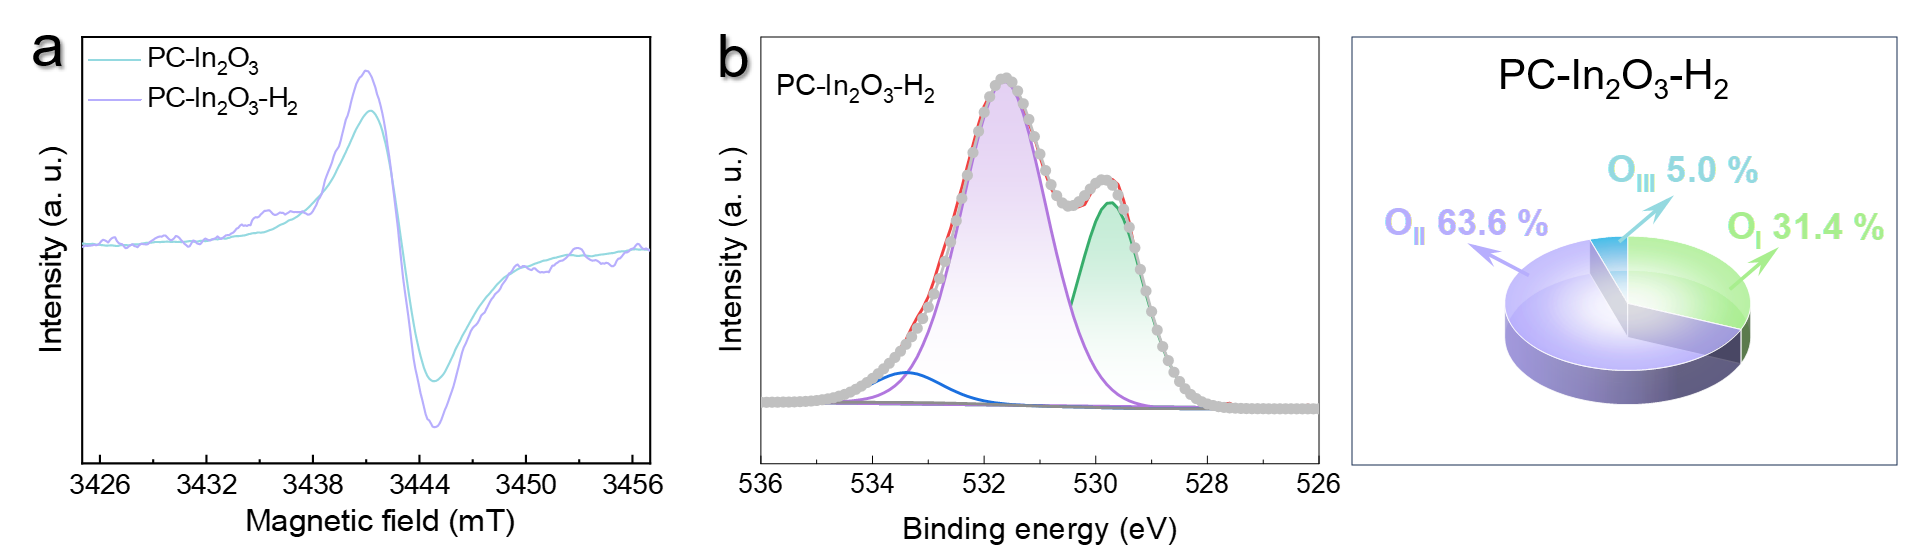


**Figure S18.** **Characterizations of PC-In2O3-H2.** (**a**) EPR spectra of the PC-In2O3 and PC-In2O3-H2 catalysts. (**b**) XPS of O*1s* spectum for the PC-In2O3-H2 catalysts.


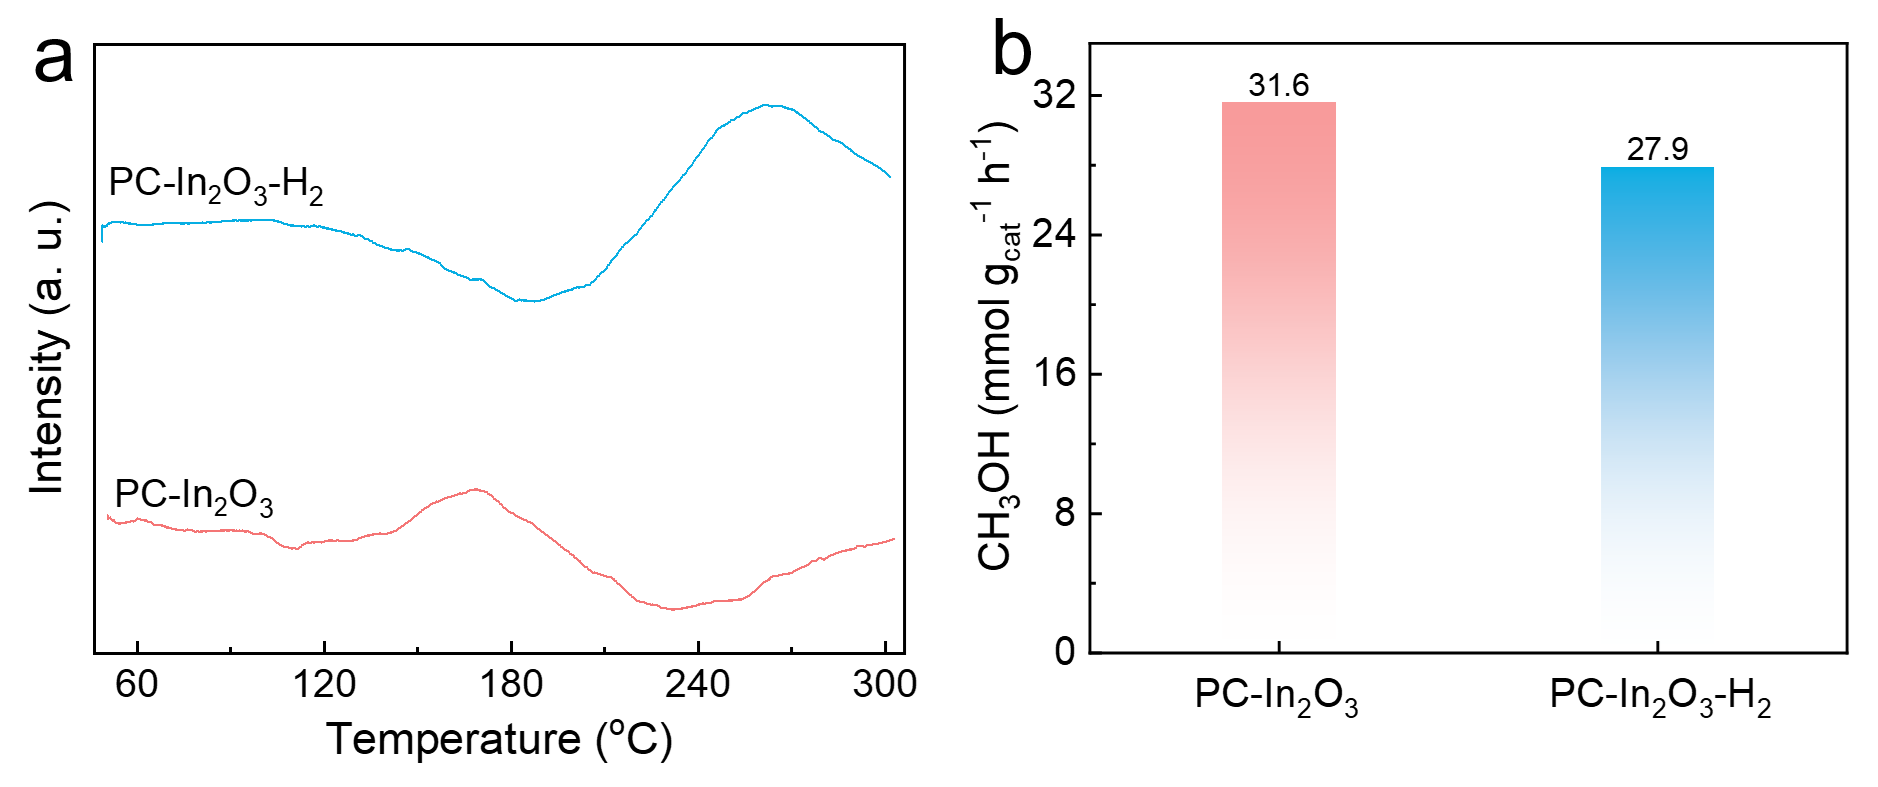


**Figure S19. Catalytic performance of PC-In2O3-H2.** (**a**) H2-TPR curves of the PC-In2O3 and PC-In2O3-H2 catalysts. (**b**) The CH3OH generation rates of PC-In2O3 and PC-In2O3-H2 for the DMC hydrogenation.


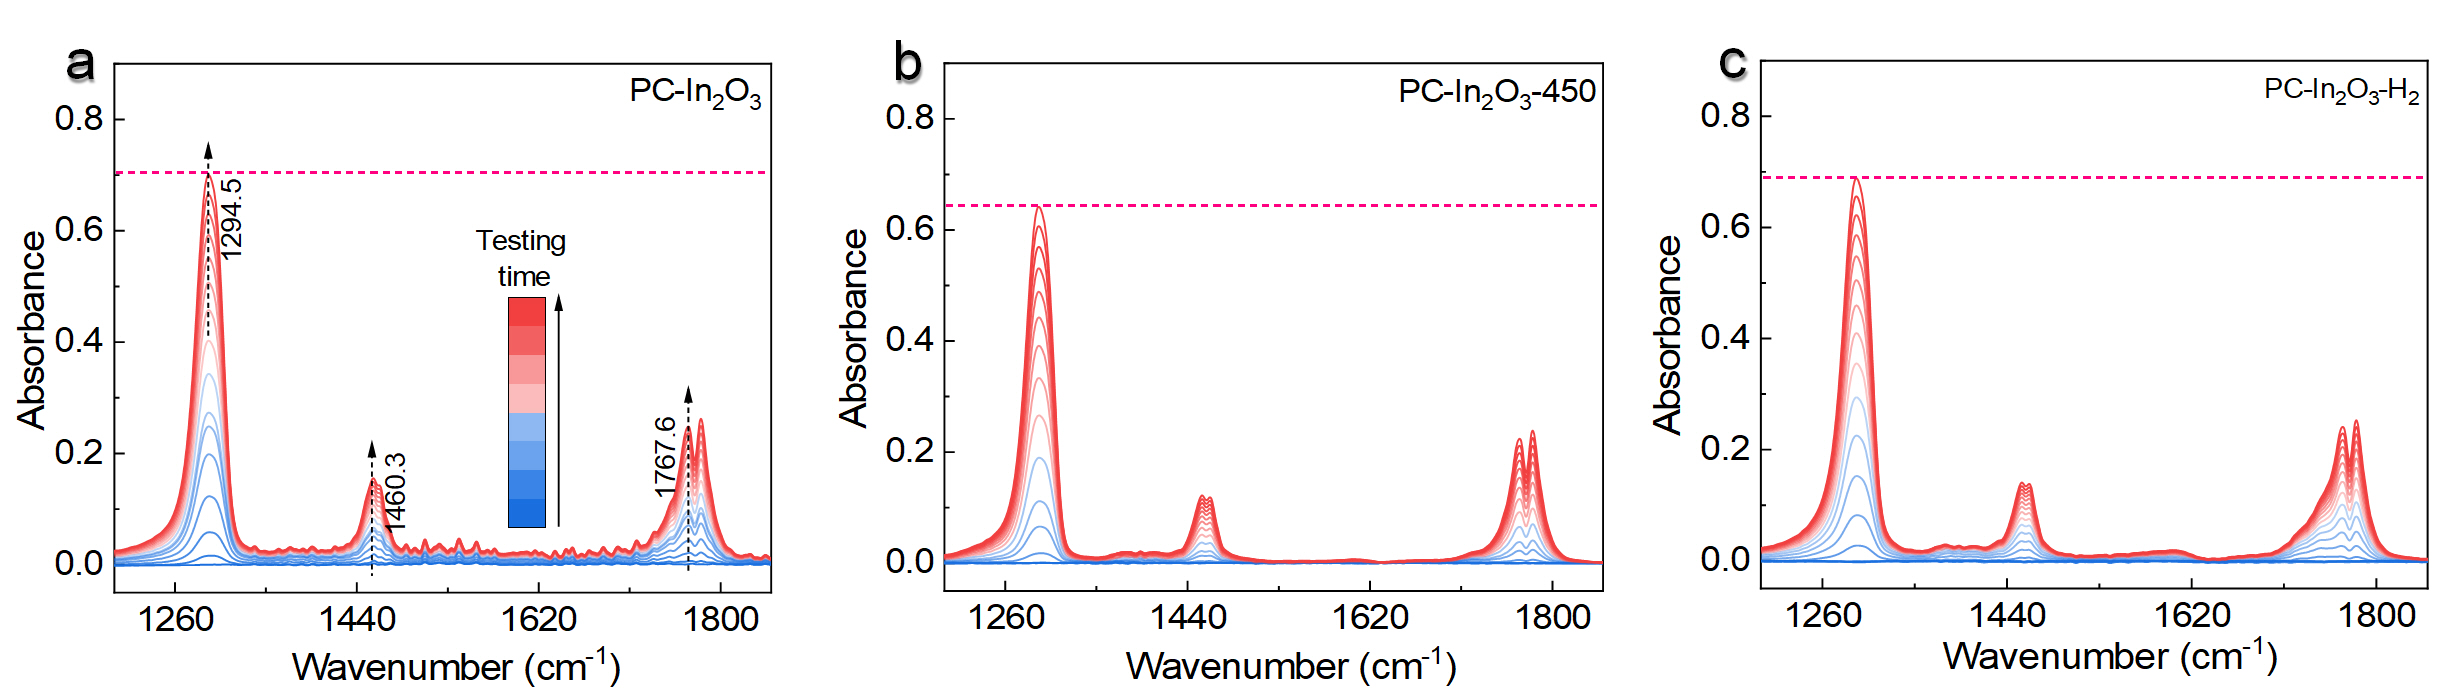


**Figure S20. *In situ* DRIFTS measurements.***In situ* DRIFTS spectra of various catalysts of (**a**) PC-In2O3, (**b**) PC-In2O3-450, (**c**) PC-In2O3-H2 under a flowing of DMC. **Experiment condition:** The catalysts were pretreated by a flow of Ar at 100 ℃ for 1 h. Subsequently, a flow of Ar was passed through a DMC solution at room temperature and then introduced into the *in situ* cell. The DRIFTS signals were recorded every 30 s.


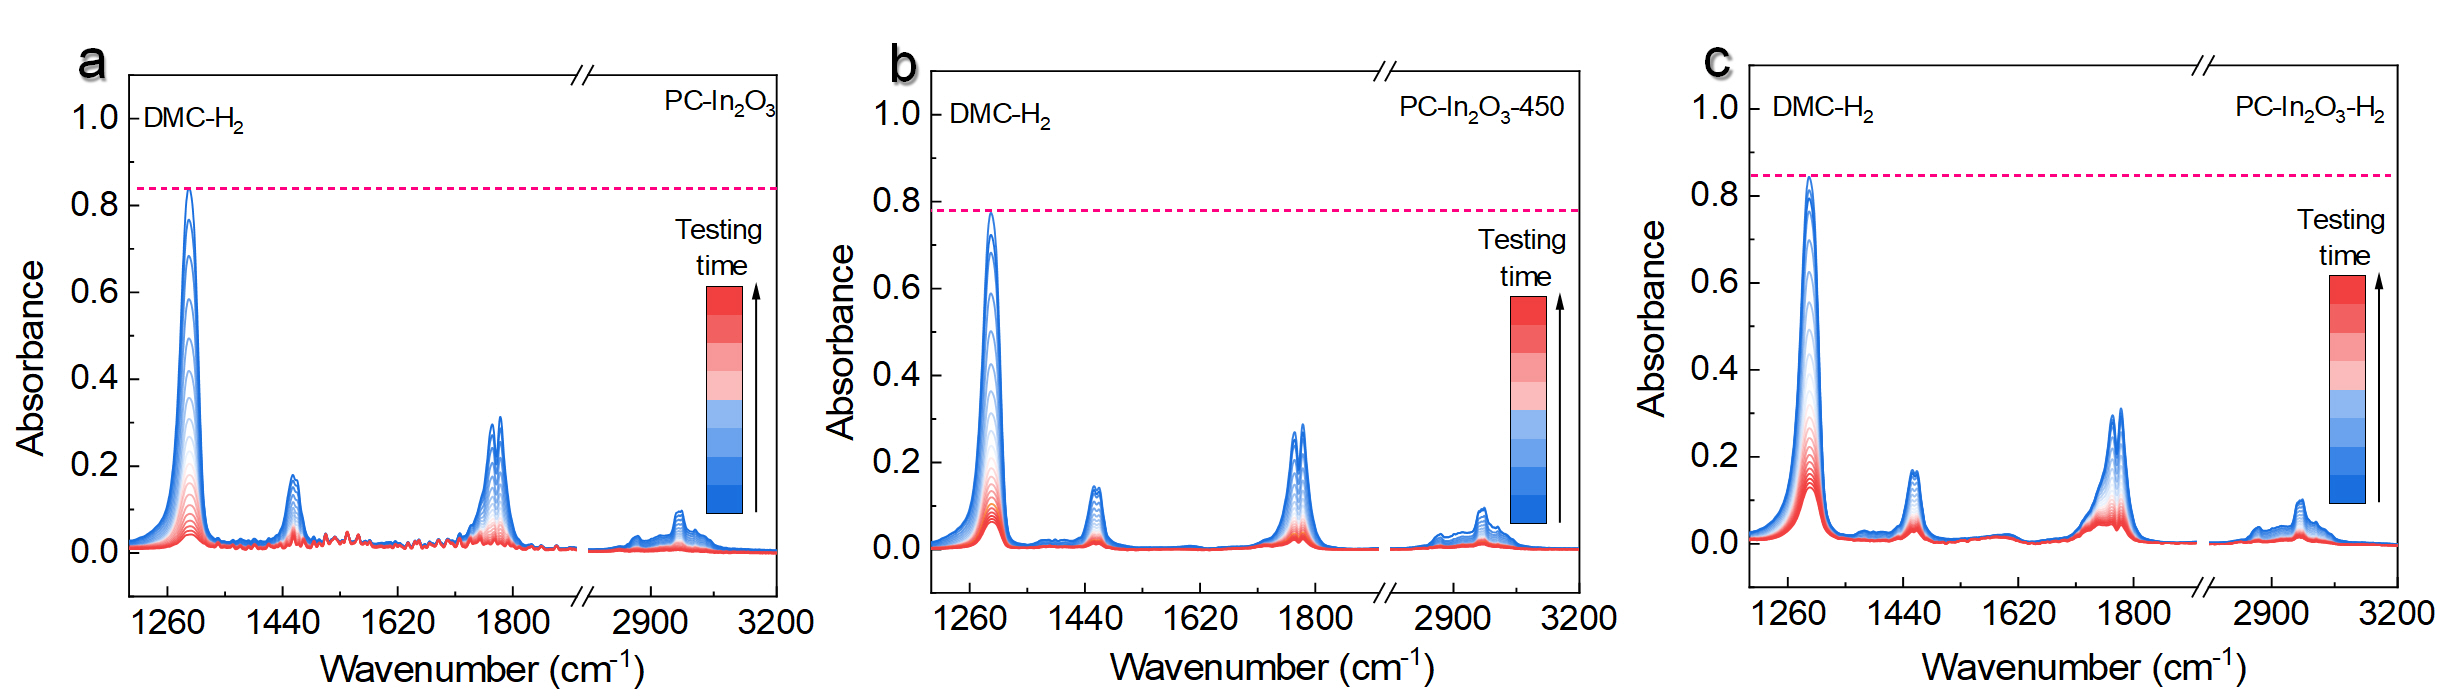


**Figure S21. *In situ* DRIFTS measurements.** *In situ* DRIFTS spectra of various catalysts of (**a**) PC-In2O3, (**b**) PC-In2O3-450, (**c**) PC-In2O3-H2 with the saturated adsorption of DMC under a flowing of H2. **Experiment condition:** After the saturation adsorption of DMC, a pure Ar flow was switched to remove the physically adsorbed DMC. Then, a flow of 50 *vol.*% H2/Ar gas was introduced and maintained for another 30 min to collect the DRIFTS signal every 30 s.


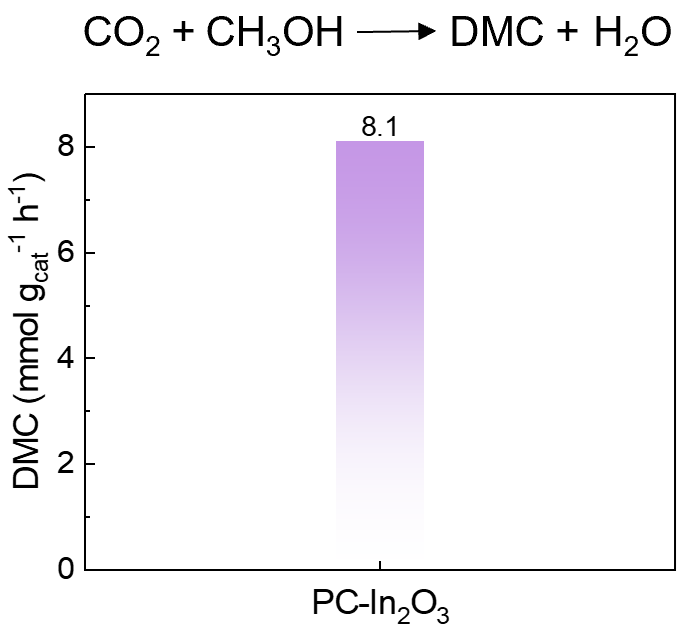


**Figure S22. The catalytic performance of PC-In2O3 for DMC synthesis through CH3OH carbonylation. Reaction conditions:** catalysts (20 mg), MeOH (10 mL), 1 h, 100 ℃ and 1 MPa CO2.

**Table S1.** XPS of O *1s* of various In2O3 catalysts.

| Sample | PC-In2O3 | | PC-In2O3-350 | | PC-In2O3-450 | | PC-In2O3-H2 | | NP-In2O3 | | Used PC-In2O3 | |
| --- | --- | --- | --- | --- | --- | --- | --- | --- | --- | --- | --- | --- |
| B.E. (eV) | Peak area | B.E. (eV) | Peak area | B.E. (eV) | Peak area | B.E. (eV) | Peak area | B.E. (eV) | Peak area | B.E. (eV) | Peak area |
| Lattice Oxygen (OI) | | | | | | | | | | | | |
| OI | 529.7 | 38943 | 529.8 | 65633 | 529.9 | 74889 | 529.6 | 95008 | 529.7 | 23513 | 529.4 | 45044 |
| Oxygen Vacancy (OII) | | | | | | | | | | | | |
| OII | 531.3 | 24415 | 531.5 | 33493 | 531.6 | 31680 | 531.6 | 192275 | 531.3 | 10626 | 531.0 | 27604 |
| Hydroxide Groups (OIII) | | | | | | | | | | | | |
| OIII | 532.8 | 2504 | 532.9 | 3551 | 533.0 | 3191 | 533.2 | 14853 | 533.1 | 1812 | 532.6 | 2314 |

**Table S2.** Summary of catalytic performance of recents heterogeneous catalysts for CO2 hydrogenation to methanol.

| **Entry** | **Catalyst** | **GHSV**  **(mL gcat-1 h-1)** | **H2:CO2**  **(MPa)** | **Temperature**  **(°C)** | ***rMeOH***  **(mmol gcat-1 h-1)** | **Ref.** |
| --- | --- | --- | --- | --- | --- | --- |
| 1 | Cu-N3 | H2O | 3:1  (4 MPa) | 70  150 | 0.19  0.45 | [6] |
| 2 | FL-MoS2 | 1500 | 3:1  (5 MPa) | 60, 80, 100, 120 | 0.03, 0.06, 0.13, 0.28 | [7] |
| 3 | N-In2O3 | 21000 | 4:1  (5 MPa) | 200 | 1.56 | [8] |
| 4 | Cu-In-Zr-O | 18000 | 4:1  (2.5 MPa) | 210, 230, 250 | 0.09, 1.56, 2.5 | [9] |
| 5 | Cu/ZnOx@MOF | 18000 | 3:1  (4 MPa) | 250 | 0.081 | [10] |
| 6 | *h*-In2O3-R | 9000 | H2:CO2:N2  72:24:4 | 240 | 3.2 | [11] |
| 7 | Cu/Zn/Ga-LDH | 18000 | 4:1  (4.5 MPa) | 210 | 0.84 | [12] |
| 8 | *h*-MoS2/ZnS | H2O | 4:1  (5 MPa) | 160, 260 | 0.003, 0.029 | [13] |
| 9 | In2O3/ZrO2 | 21000 | 4:1  (4 MPa) | 200, 230 | 0.03, 1.25 | [14] |
| 10 | Cu/BaTiO2.8H0.2 | 20 mL/min | 24 %/72 %/4 % CO2/H2/Ar  (3 MPa) | 250 | 4.7 mmol gCu-1 h-1 | [15] |
| 11 | h-PdMo/Mo2N |  |  | 60, 80, 100, 120, 140, 160 | 0.005, 0.01, 0.015, 0.02, 0.035, 0.05 | [16] |
| 12 | MOF-808-Zn | 9000 | 3:1  (4 MPa) | 250 | 5.96 | [17] |
| 13 | Cu/Zr-UiO66-COOH (Zr4+) | 140 sccm | 5:1  (0.2 MPa) | 220 | 0.4 | [18] |
| 14 | ZnZrOx | 24000 | 4:1  (5 MPa) | 320 | 14.1 | [19] |
| 15 | Cu-ZnO/amUiO-66 | 120 sccm | 5:1  (0.2 MPa) | 220 | 0.7 | [20] |
| 16 | *c*-In2O3-S | 9000 | H2/CO2/N2 = 73/24/3 | 240, 260, 280, 300, 320, 340, 360 | 4.2, 5, 5.9, 7.8, 8.9, 6.8, 4.3 | [21] |
| 17 | Cu/ZrO2-SiO2 | 4000 | 3:1  (3 MPa) | 190, 210, 230 | 0.025, 0.053, 0.042  mmol m-2 h-1 | [22] |
| 18 | Pt/HxMoO3−y | 1,4-dioxane  15 mL | 3:1  (3 MPa) | 200 | 1.53 | [23] |
| 19 | 95In2O3-5Al2O3 | 30000 | H2/CO2/N2 = 30/10/10  (3 MPa) | 260 | 2.8 | [24] |
| 20 | 5%Ni/In2O3 | - | CO2/H2/N2 = 10:30:10 mL/min.  (3 MPa) | 250 | 7.8 | [25] |
| 21 | Co@Si0.95 | 6000 | 3:1  (2 MPa) | 260, 280, 300, 320, 340, 360, 380 | 0.9, 1.5, 2.5, 3.0, 2.8, 2.6, 2.5 | [26] |
| 22 | Re(1)/TiO2 | 1,4-dioxane (1 mL) | 5:1  (6 MPa) | 150 | 1.8 | [27] |
| 23 | ZnO-ZrO2 | 24000 | 3:1  (5 MPa) | 340 | 0.5 mmol m-2 h-1 | [28] |
| 24 | Cu/MoS2@SiO2 | 24000 | 4:1  (5 MPa) | 260 | 6.11 molMeOH molMo–1 h–1 | [29] |
| 25 | 2Pd/CeO2-R | 2000 | 3:1  (3 MPa) | 240 | 1.4 | [30] |
| 26 | UiO-67-Pt | 0.01 gcat min mL–1 | 3:1  (0.8 MPa) | 170 | 2.16 | [31] |
| 27 | PtGa-GaOx | 6-100 mL/min | 2.5 MPa | 230 | 7.2 molCH3OH h–1 molPt–1 | [32] |
| 28 | Cu/ZnO2/Al2O3 | - | CO2 (1 MPa)  H2 (2 MPa) | 100 | 1.4 | This work |
| 29 | NP-In2O3 | - | CO2 (1 MPa)  H2 (2 MPa) | 100 | 1.1 | This work |
| 30 | PC-In2O3 | - | CO2 (1 MPa)  H2 (2 MPa) | 70, 80, 90, 100 | 0.76, 1.80, 3.9, 6.5 | This work |

***References:***

1. G. Kresse & Furthmiiller, J. Efficiency of ab-initio total energy calculations for metals and semiconductors using a plane-wave basis set. *Comput. Mater. Sci* **6**, 15-50 (1996).

2. Furthmüller, J. Efficient iterative schemes for ab initio total-energy calculations using a plane-wave basis set. *Phys. Rev. B* **54**, 11169-11186 (1996).

3. Kresse, G. Ab initio molecular dynamics for liquid metals. *Phys. Rev. B* **47**, 222-229 (1995).

4. G. Kresse & Joubert, D. From ultrasoft pseudopotentials to the projector augmented-wave method. *Phys. Rev. B* **59**, 1758-1775 (1999).

5. Dang, S. *et al.* Rationally designed indium oxide catalysts for CO2 hydrogenation to methanol with high activity and selectivity. *Sci. Adv.* **6**, 1-11 (2020).

6. Yang, T. *et al.* Coordination tailoring of Cu single sites on C3N4 realizes selective CO2 hydrogenation at low temperature. *Nat. Commun.* **12**, 6022 (2021).

7. Hu, J. *et al.* Sulfur vacancy-rich MoS2 as a catalyst for the hydrogenation of CO2 to methanol. *Nat. Catal.* **4**, 242-250 (2021).

8. Yang, Y., Shen, C., Sun, K., Mei, D. & Liu, C.-j. Enhanced surface charge localization over nitrogen-doped In2O3 for CO2 hydrogenation to methanol with improved stability. *ACS Catal.* **13**, 6154-6168 (2023).

9. Yao, L., Shen, X., Pan, Y. & Peng, Z. Synergy between active sites of Cu-In-Zr-O catalyst in CO2 hydrogenation to methanol. *J. Catal.* **372**, 74-85 (2019).

10. An, B. *et al.* Confinement of ultrasmall Cu/ZnOx nanoparticles in metal-organic frameworks for selective methanol synthesis from catalytic hydrogenation of CO2. *J. Am. Chem. Soc.* **139**, 3834-3840 (2017).

11. Dang, S. S., *et al.* Rationally designed indium oxide catalysts for CO2 hydrogenation to methanol with high activity and selectivity. *Sci. Adv.* **6**, 1-11 (2020).

12. Li, M. M.-J. *et al.* CO2 hydrogenation to methanol over catalysts derived from single cationic layer CuZnGa LDH precursors. *ACS Catal* **8**, 4390-4401 (2018).

13. Zhou, S. & Zeng, H. C. Boxlike assemblages of few-layer MoS2 nanosheets with edge blockage for high-efficiency hydrogenation of CO2 to methanol. *ACS Catal.*, 9872-9886 (2022).

14. Martin, O. *et al.* Indium oxide as a superior catalyst for methanol synthesis by CO2 hydrogenation. *Angew. Chem. Int. Ed.* **55**, 6261-6265 (2016).

15. He, Y. *et al.* Significant roles of surface hydrides in enhancing the performance of Cu/BaTiO2.8H0.2 catalyst for CO2 hydrogenation to methanol. *Angew. Chem. Int. Ed.* **63**, 1-9 (2023).

16. Araújo, T. P. *et al.* Reaction‐induced metal‐metal oxide interactions in Pd‐In2O3/ZrO2 catalysts drive selective and stable CO2 hydrogenation to methanol. *Angew. Chem. Int. Ed.* **62**, 1-11 (2023).

17. Zhang, J. *et al.* Neighboring Zn–Zr sites in a metal–organic framework for CO2 hydrogenation. *J. Am. Chem. Soc.* **143**, 8829-8837 (2021).

18. Zhu, Y. *et al.* Copper-zirconia interfaces in UiO-66 enable selective catalytic hydrogenation of CO2 to methanol. *Nat. Commun.* **11**, 1-11 (2020).

19. Araújo, T. P. *et al.* Design of flame‐made ZnZrOx catalysts for sustainable methanol synthesis from CO2. *Adv. Energy Mater.* **13**, 1-17 (2023).

20. Mitsuka, Y. *et al.* Fabrication of integrated copper‐based nanoparticles/amorphous metal–organic framework by a facile spray‐drying method: Highly enhanced CO2 hydrogenation activity for methanol synthesis. *Angew. Chem. Int. Ed.* **60**, 22283-22288 (2021).

21. Dang, S. *et al.* Rationally designed indium oxide catalysts for CO2 hydrogenation to methanol with high activity and selectivity. *Sci. Adv.* **6** 1-11 (2020).

22. Yang, M. *et al.* Unlocking a dual‐channel pathway in CO2 hydrogenation to methanol over single‐site zirconium on amorphous silica. *Angew. Chem. Int. Ed.* **63**, e202312292 (2023).

23. Kuwahara, Y. *et al.* A quasi-stable molybdenum sub-oxide with abundant oxygen vacancies that promotes CO2 hydrogenation to methanol. *Chem. Sci.* **12**, 9902-9915 (2021).

24. Liu, L., Mezari, B., Kosinov, N. & Hensen, E. J. M. Al promotion of In2O3 for CO2 hydrogenation to methanol. *ACS Catal.* **13**, 15730-15745 (2023).

25. Zhu, J. *et al.* Ni–In synergy in CO2 hydrogenation to methanol. *ACS Catal.* **11**, 11371-11384 (2021).

26. Wang, L. *et al.* Silica accelerates the selective hydrogenation of CO2 to methanol on cobalt catalysts. *Nat. Commun* **11**, 1-9 (2020).

27. Ting, K. W., Toyao, T., Siddiki, S. M. A. H. & Shimizu, K.-i. Low-temperature hydrogenation of CO2 to methanol over heterogeneous TiO2-supported Re catalysts. *ACS Catal.* **9**, 3685-3693 (2019).

28. Wang, J. *et al.* A highly selective and stable ZnO-ZrO2 solid solution catalyst for CO2 hydrogenation to methanol. *Sci. Adv.* **3**, 1701290 (2017).

29. Zhou, S. *et al.* Strained few-layer MoS2 with atomic copper and selectively exposed in-plane sulfur vacancies for CO2 hydrogenation to methanol. *Nat. Commun* **14**, 1-15 (2023).

30. Jiang, F. *et al.* Insights into the influence of CeO2 crystal facet on CO2 hydrogenation to methanol over Pd/CeO2 catalysts. *ACS Catal.* **10**, 11493-11509 (2020).

31. Gutterød, E. S. *et al.* Influence of defects and H2O on the hydrogenation of CO2 to methanol over Pt nanoparticles in UiO-67 metal–organic framework. *J. Am. Chem. Soc.* **142**, 17105-17118 (2020).

32. Zhou, W. *et al.* Reactivity switch of platinum with gallium: from reverse water gas shift to methanol synthesis. *J. Am. Chem. Soc.* **146**, 10806-10811 (2024).
